# Supplementary material
Source: PubMed Central journal article supplement (PMC4252613)

# Product C: 22(OH)Lumisterol

## Mass spectrum

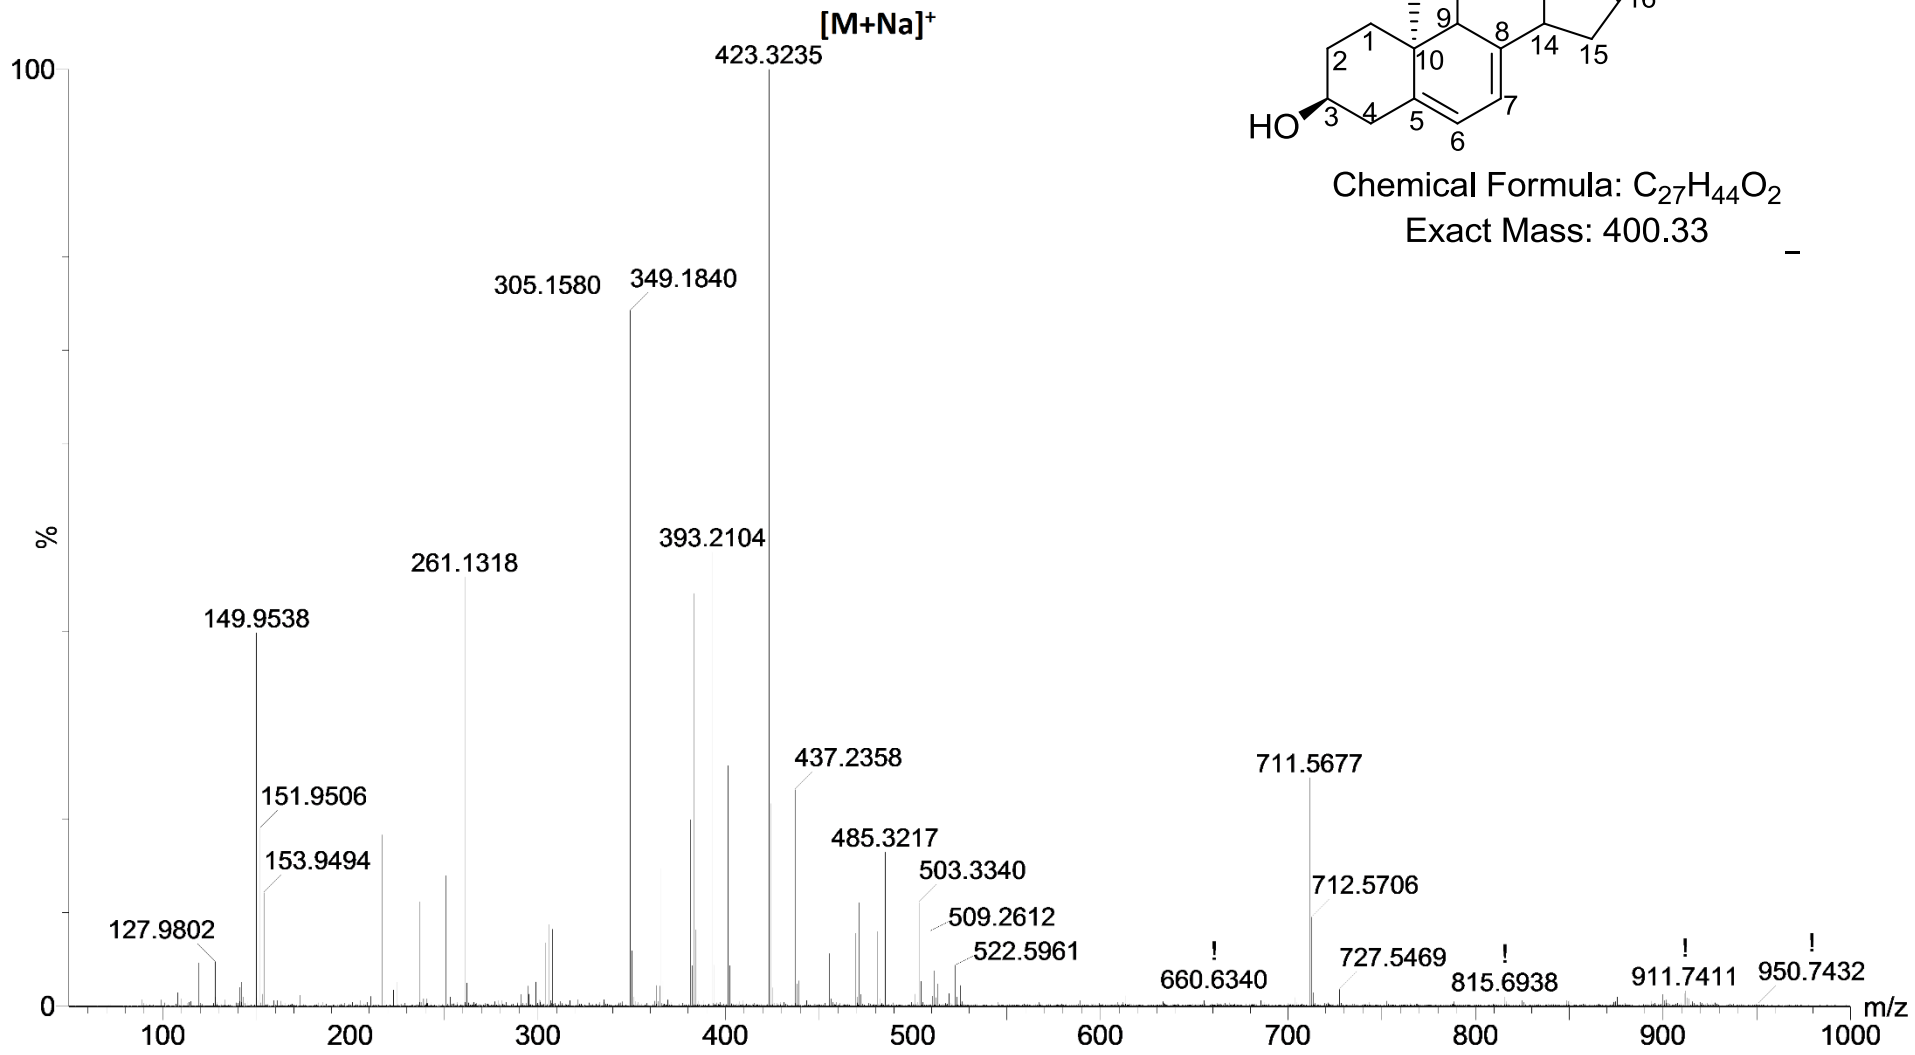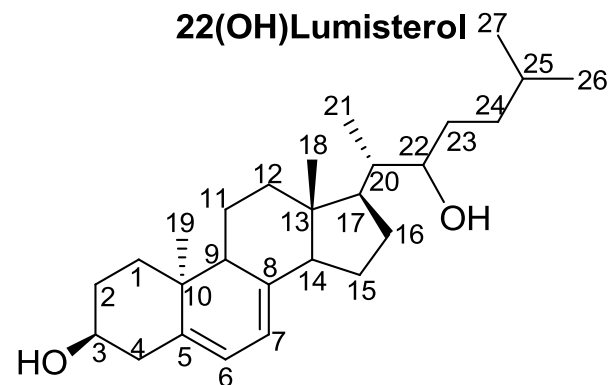

Chemical Formula:  $C_{27}H_{44}O_2$

Exact Mass: 400.33

# 22(OH)Lumisterol

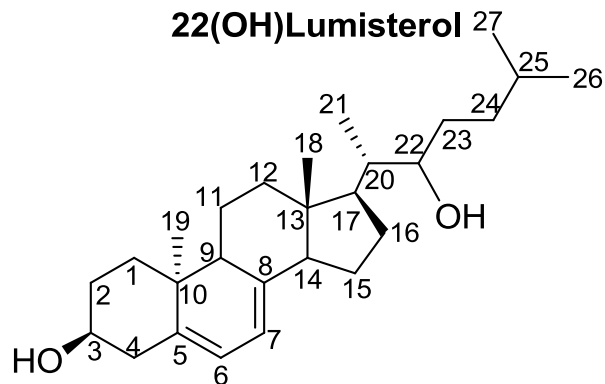

Chemical Formula:  $C_{27}H_{44}O_2$

Exact Mass: 400.33

## $^1H$ NMR

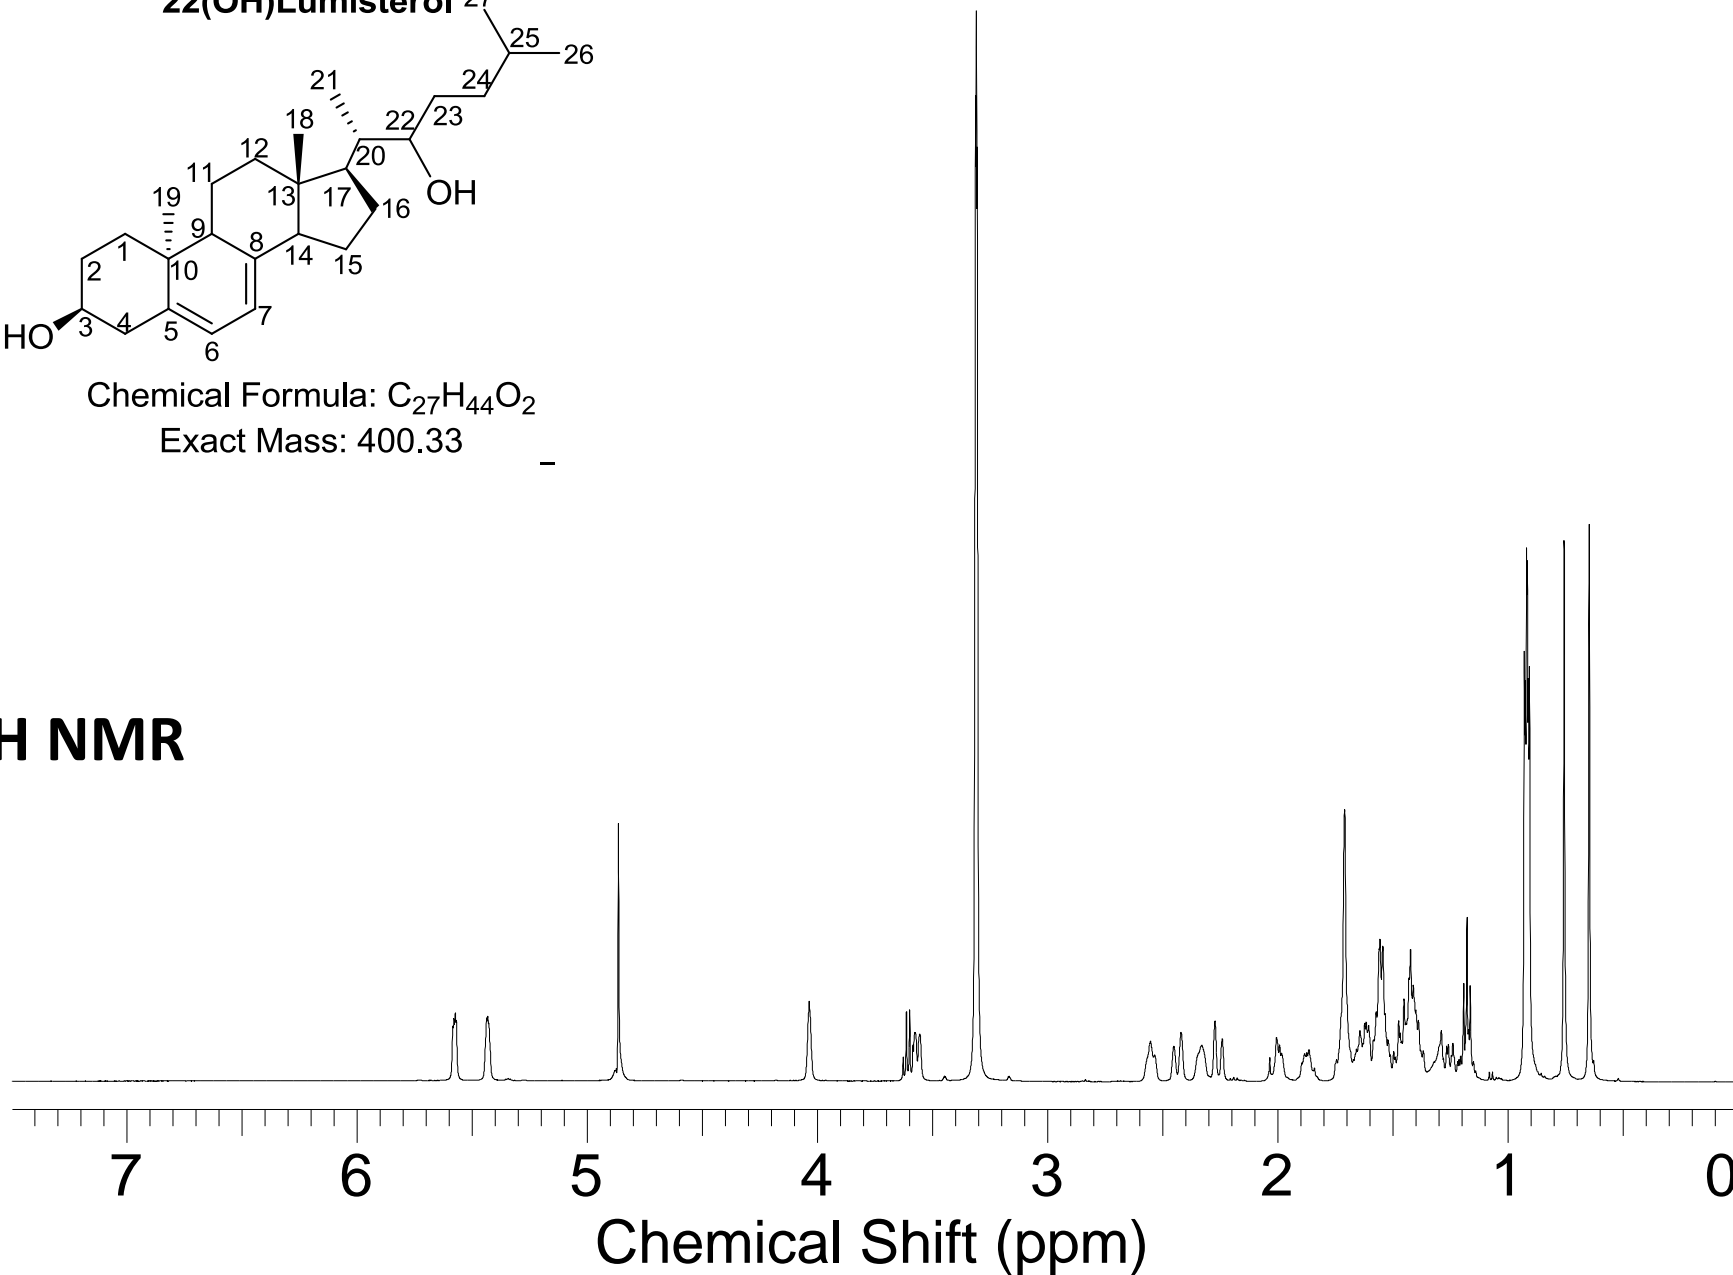

# 22(OH)Lumisterol

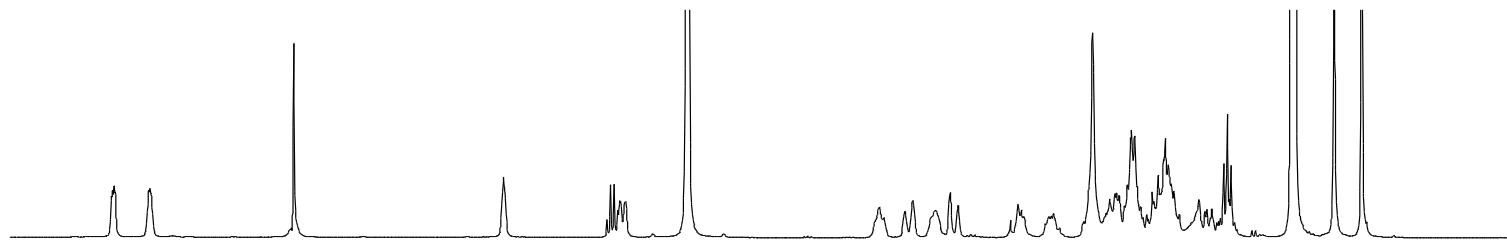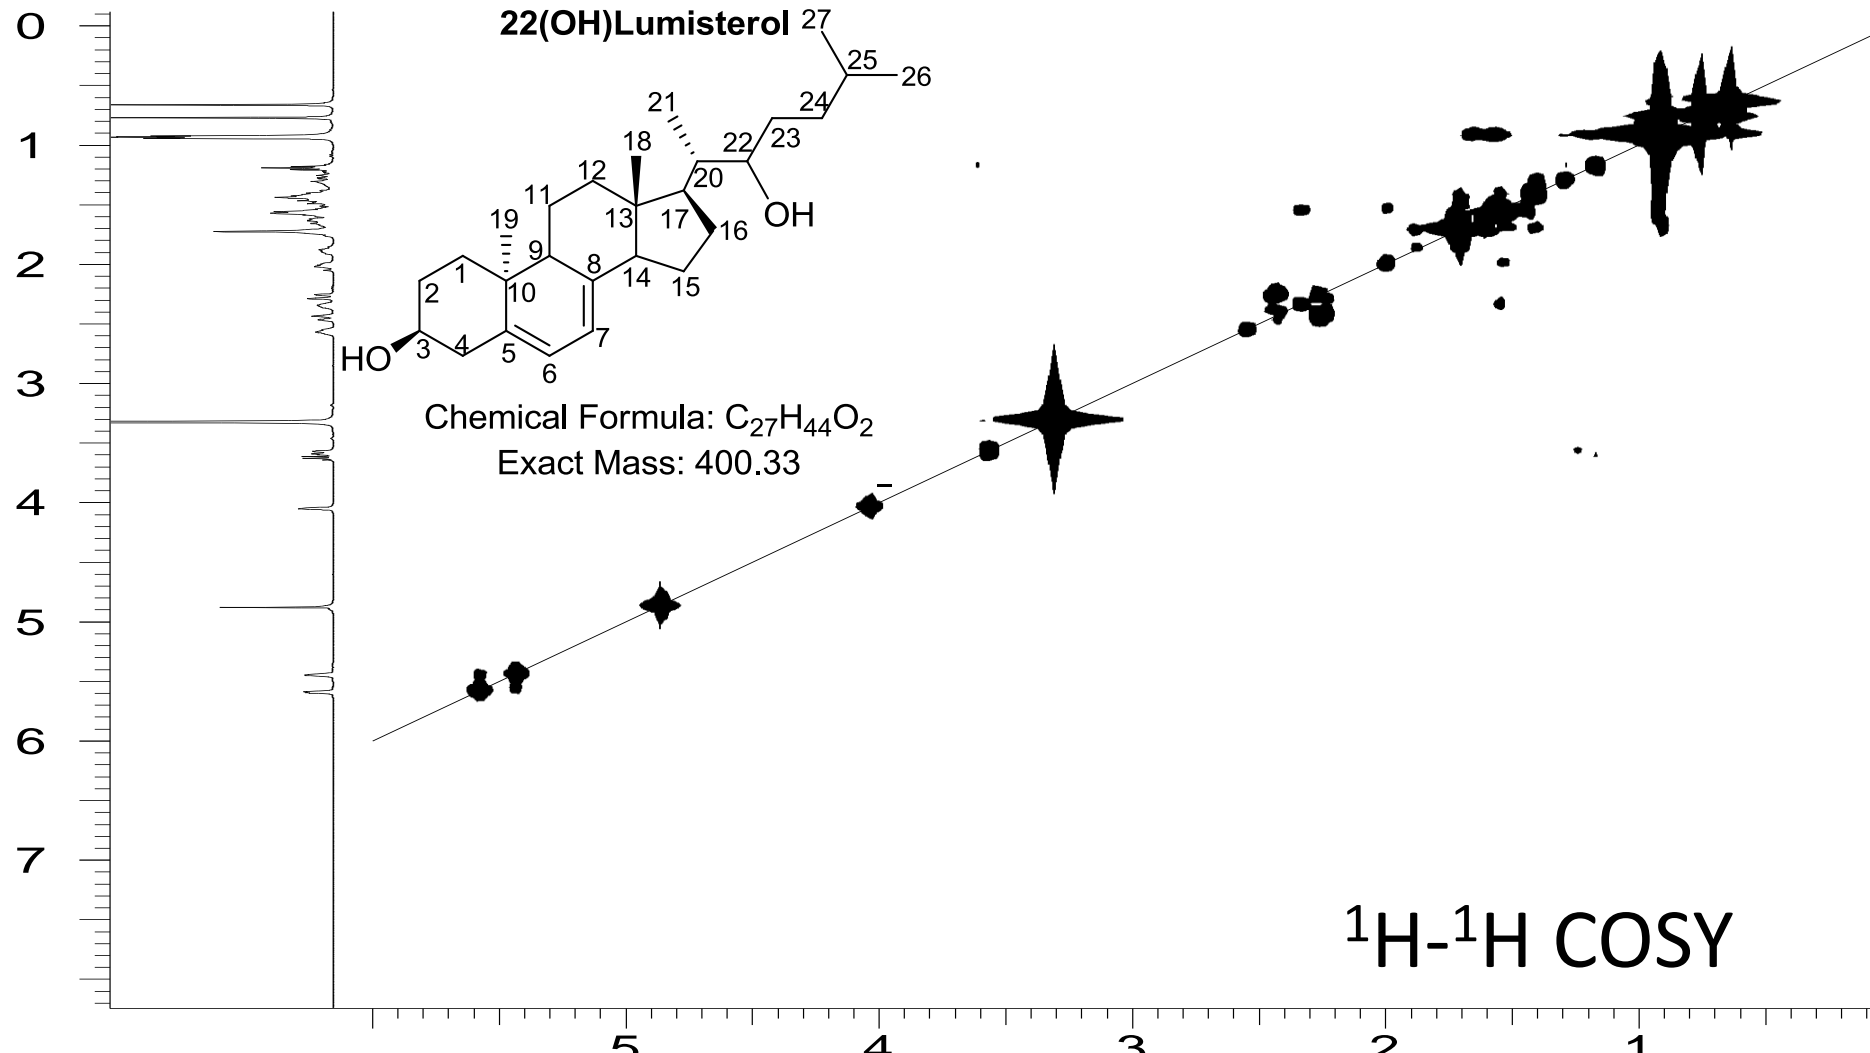

# 22(OH)Lumisterol

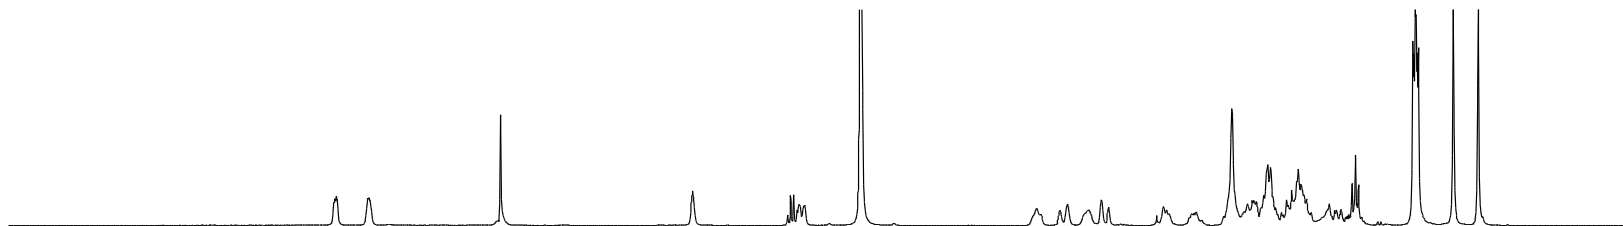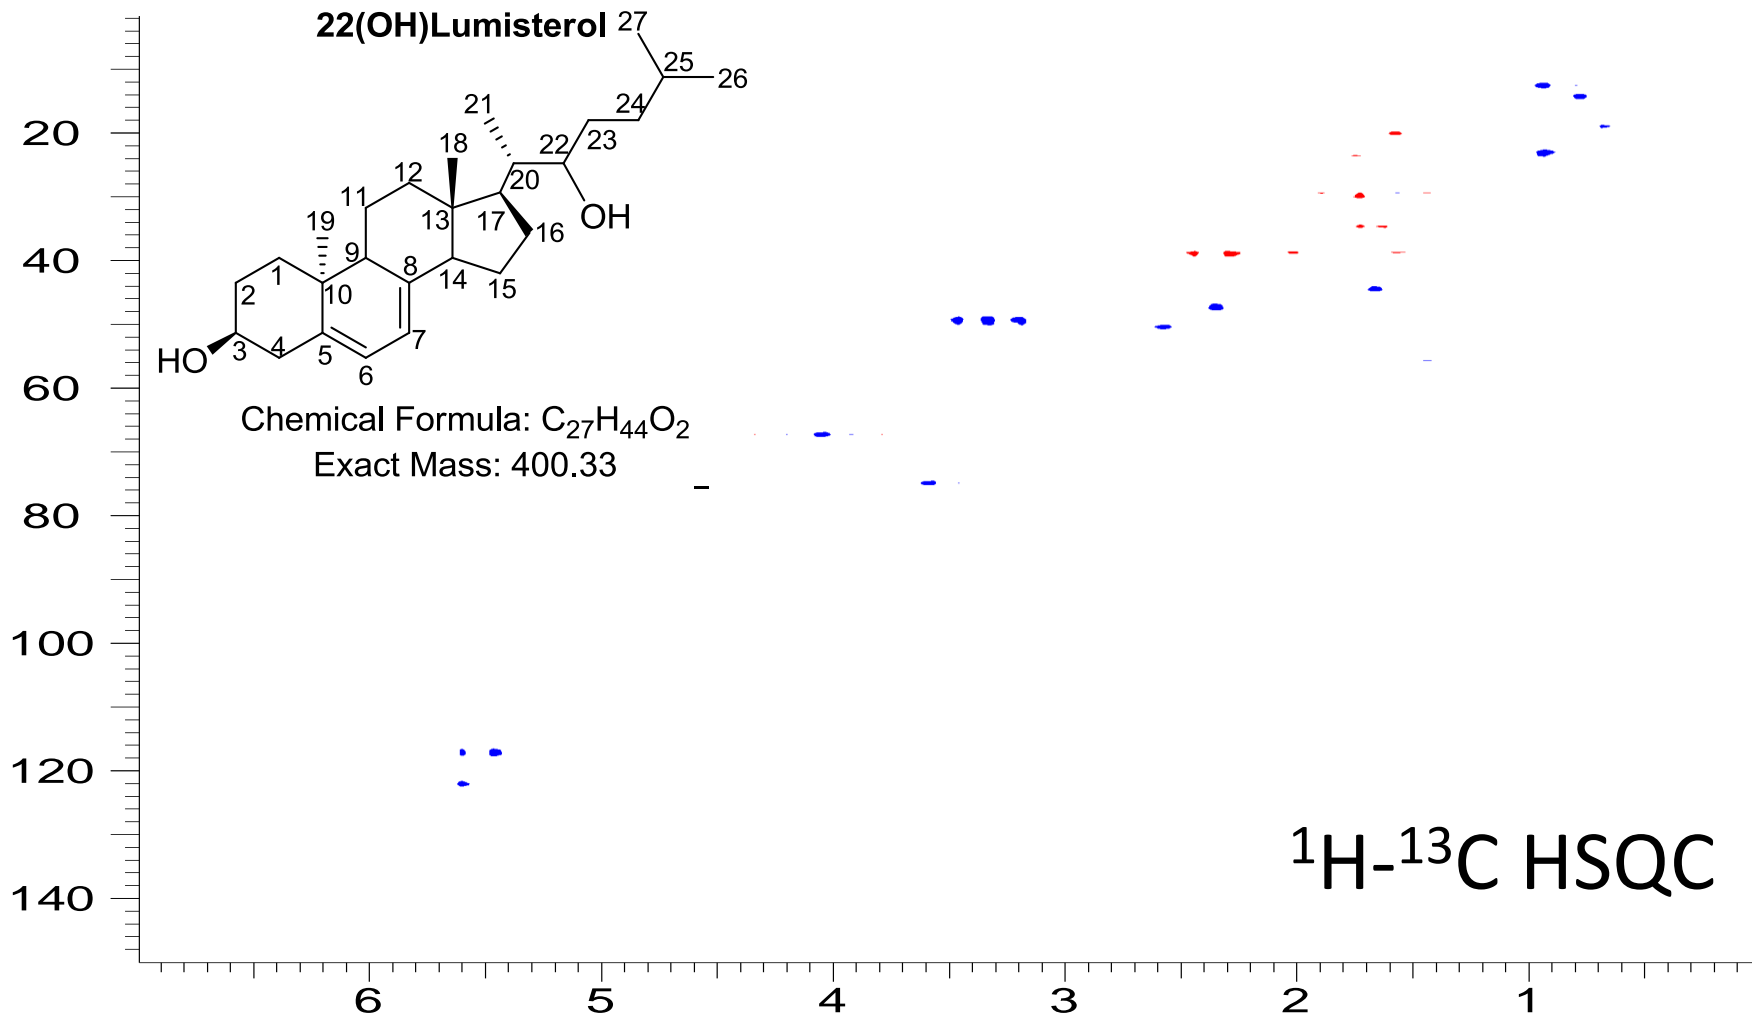

# 22(OH)Lumisterol

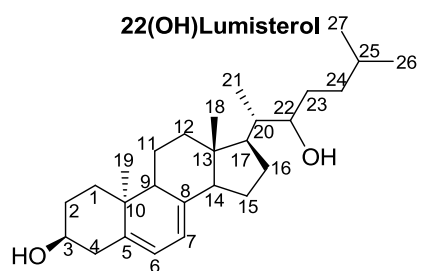

Chemical Formula:  $C_{27}H_{44}O_2$

Exact Mass: 400.33

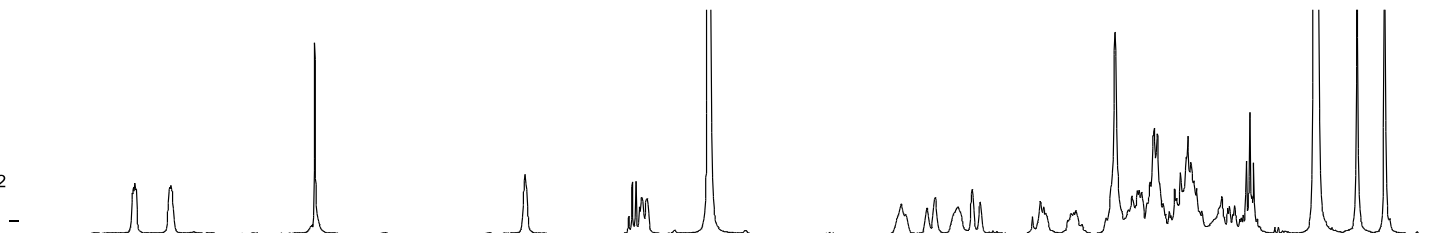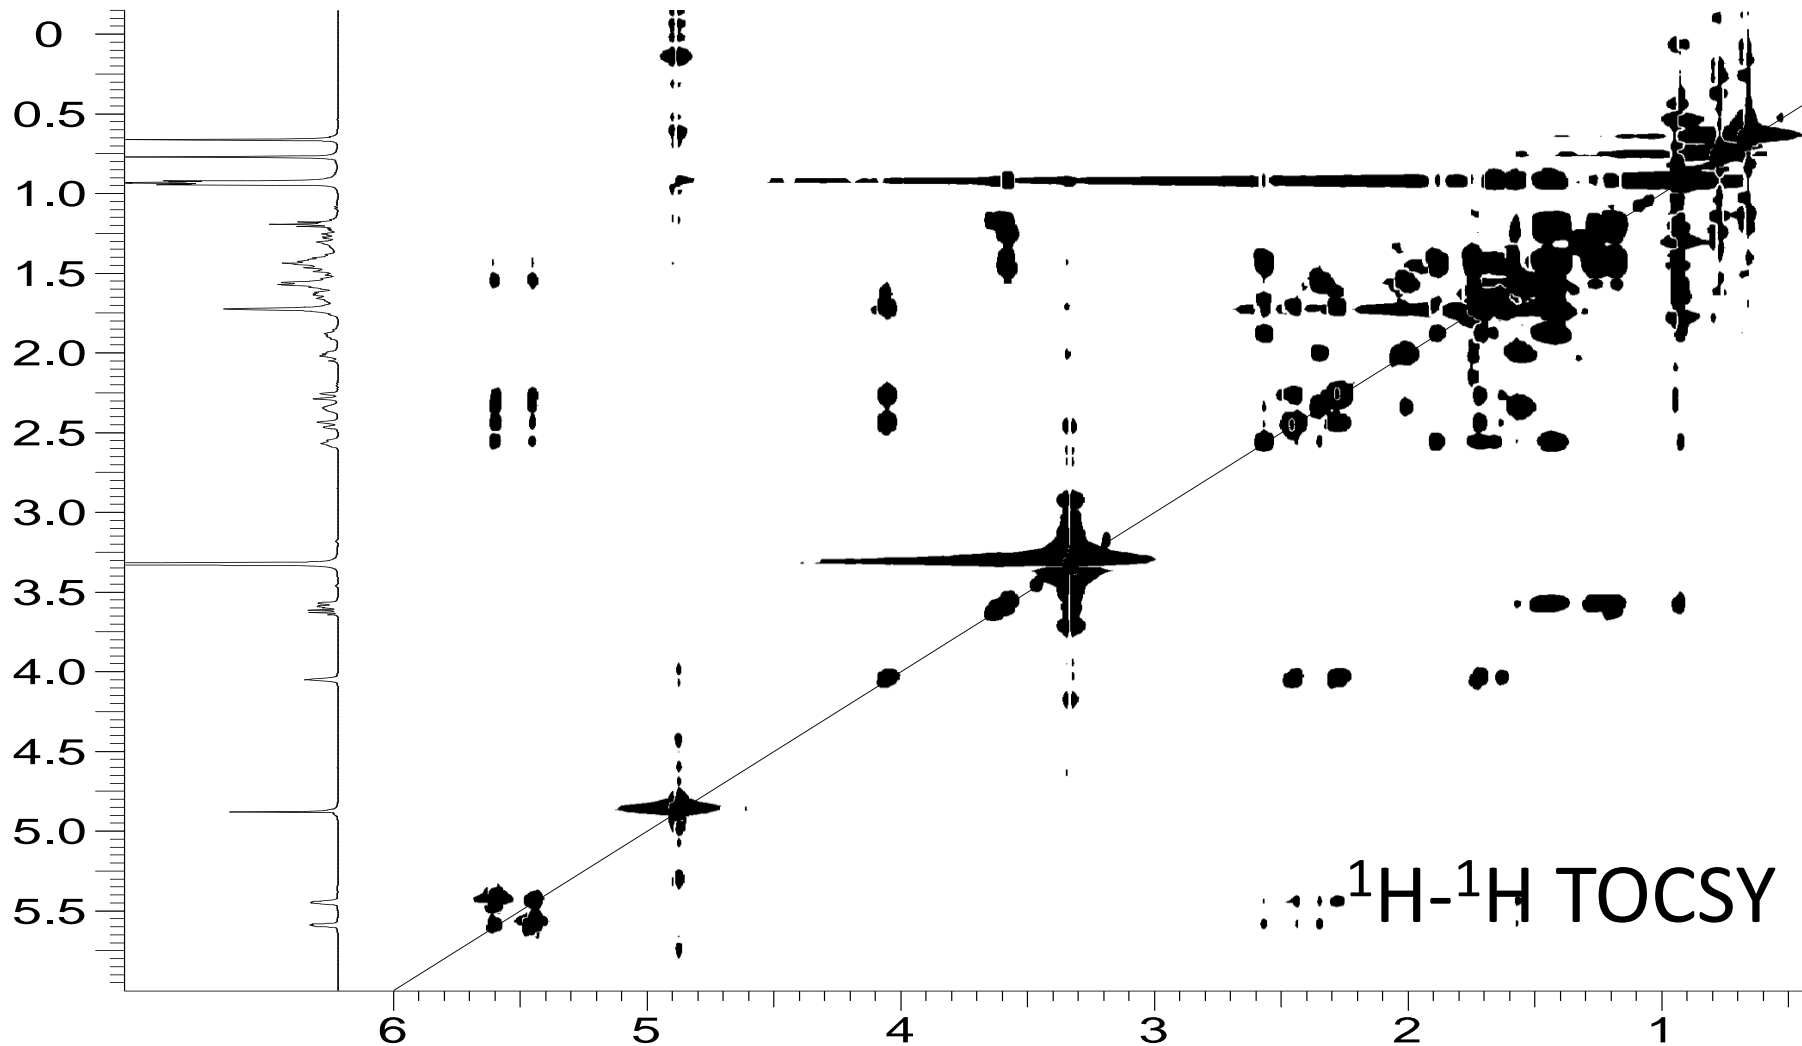

# 22(OH)Lumisterol

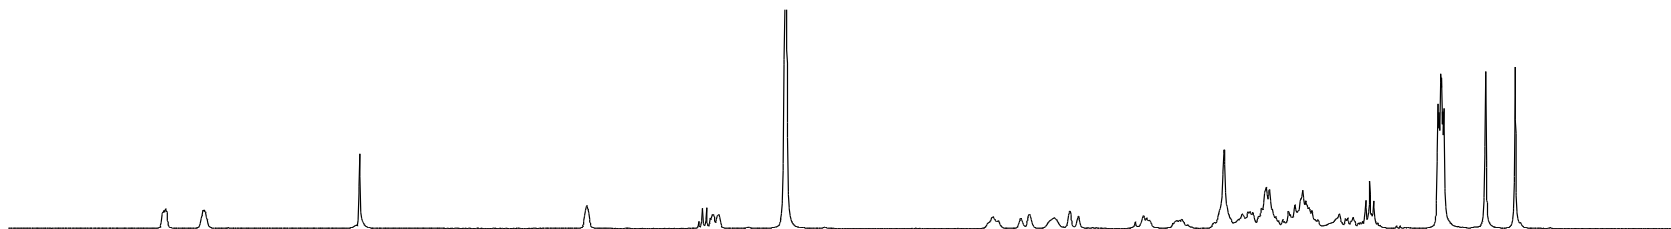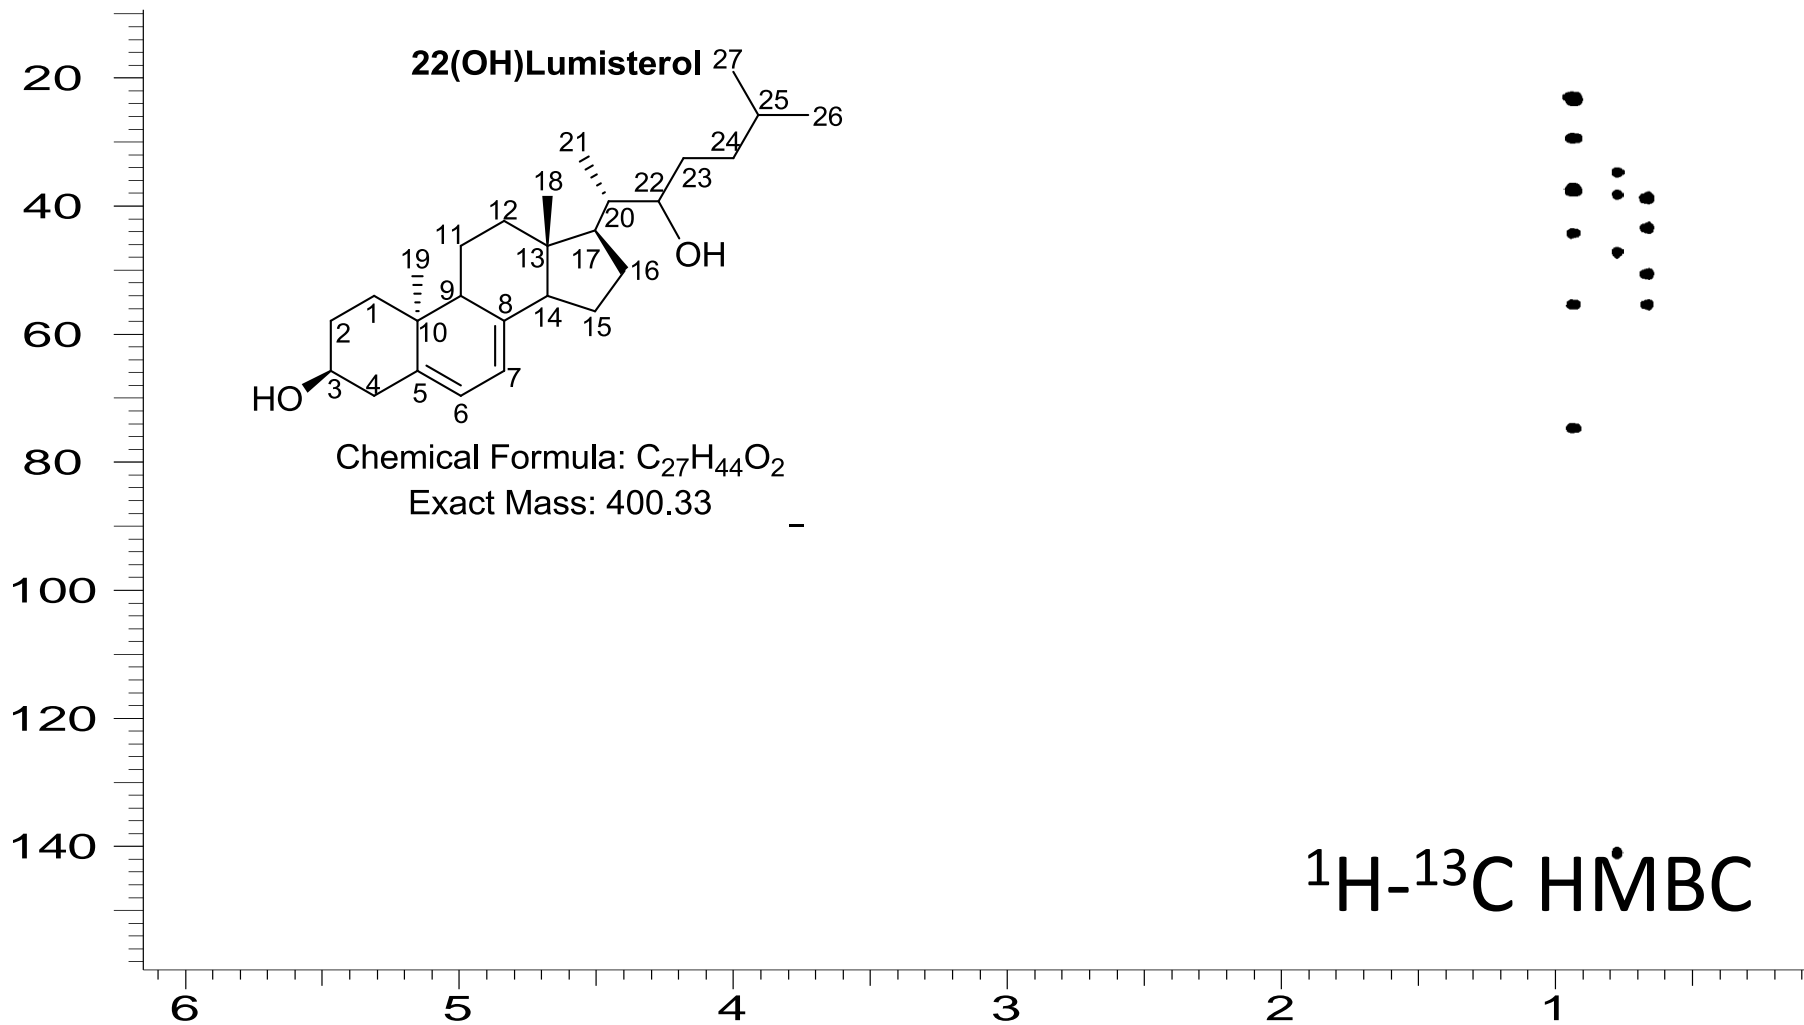

# Product B: 24(OH)Lumisterol

## Mass spectrum

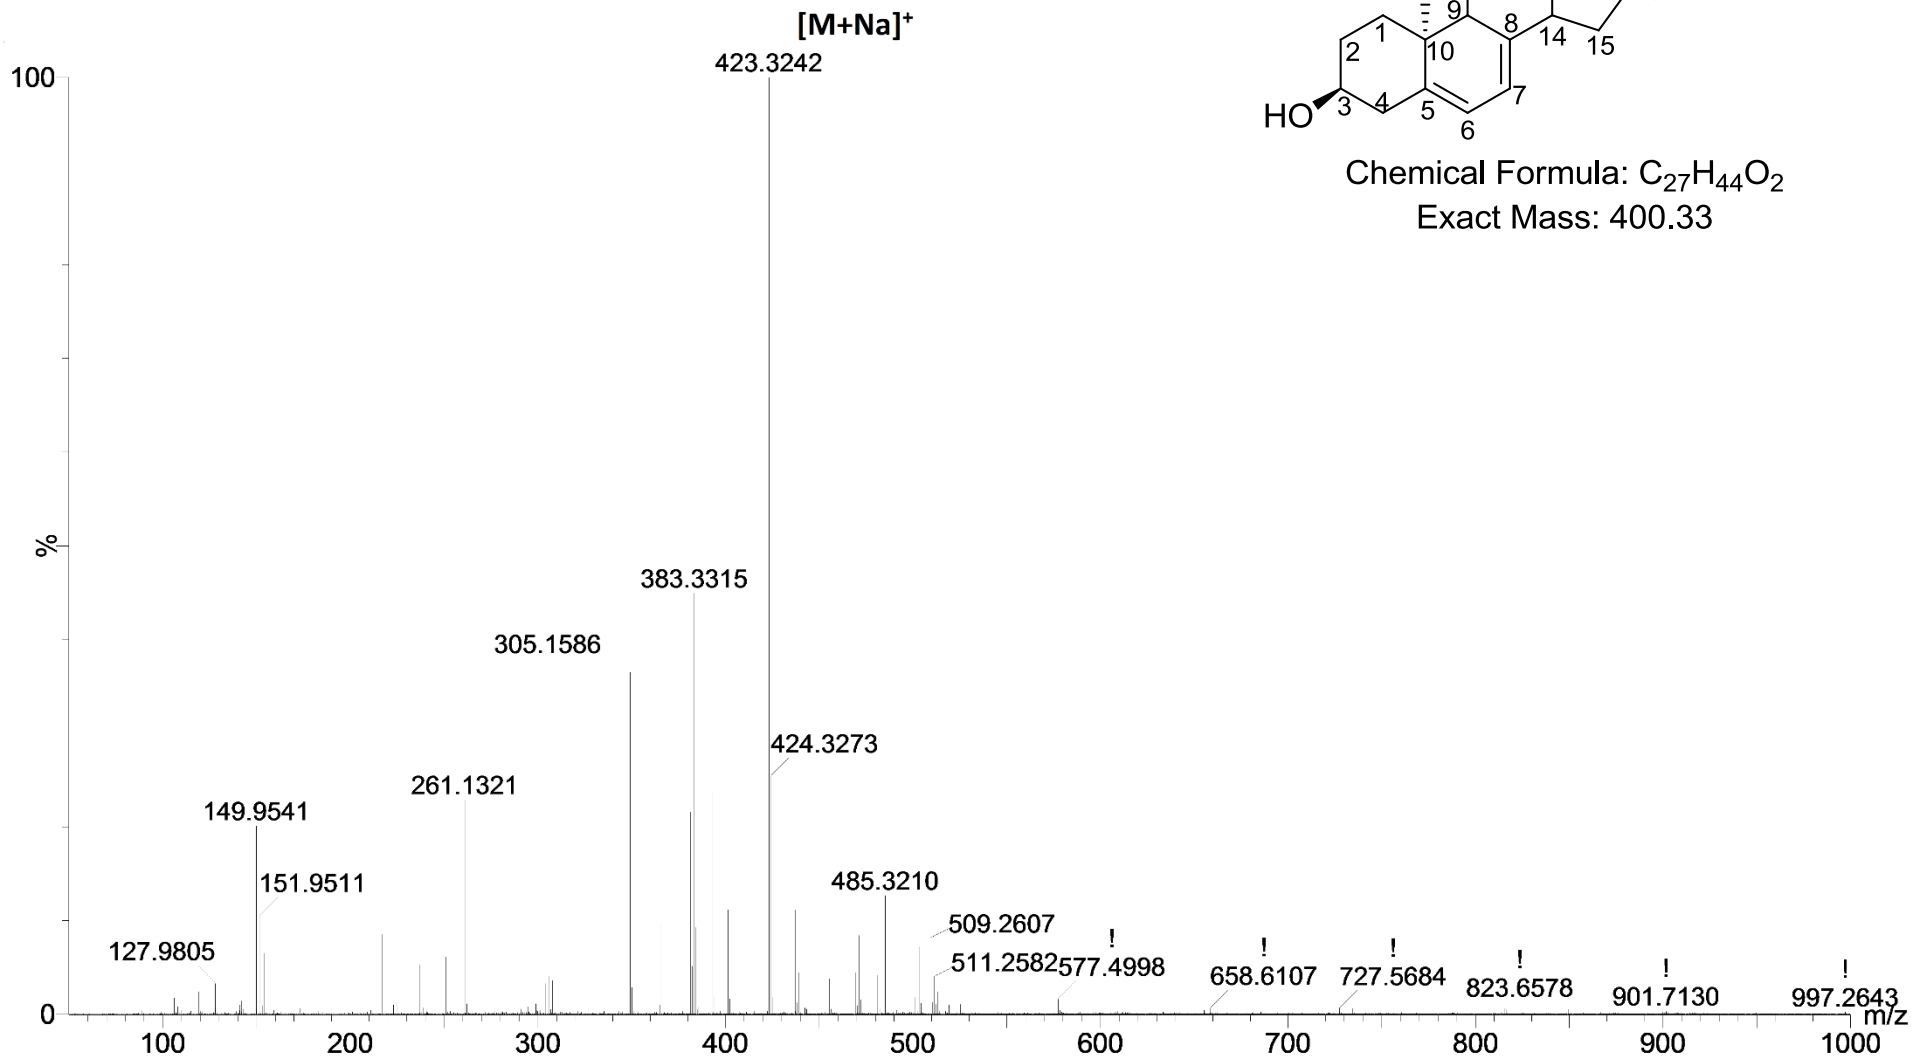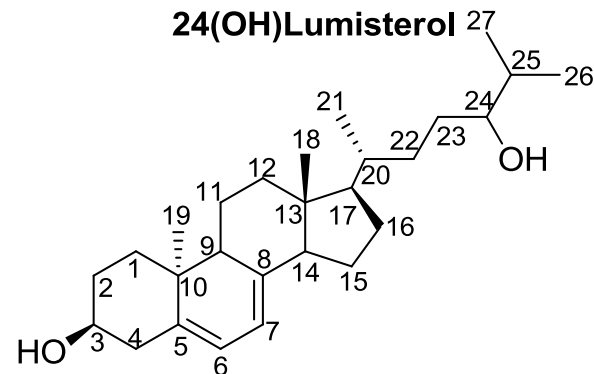

Chemical Formula:  $C_{27}H_{44}O_2$   
Exact Mass: 400.33

# 24(OH)Lumisterol

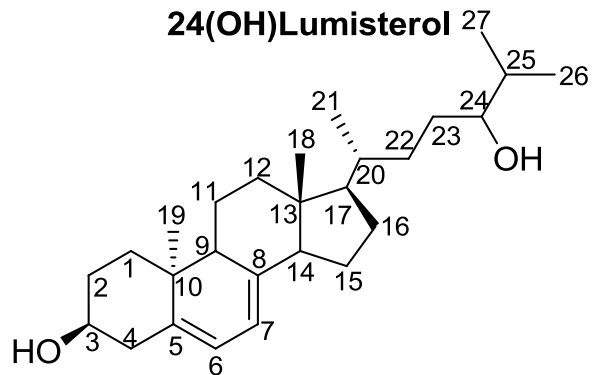

## $^1H$ NMR

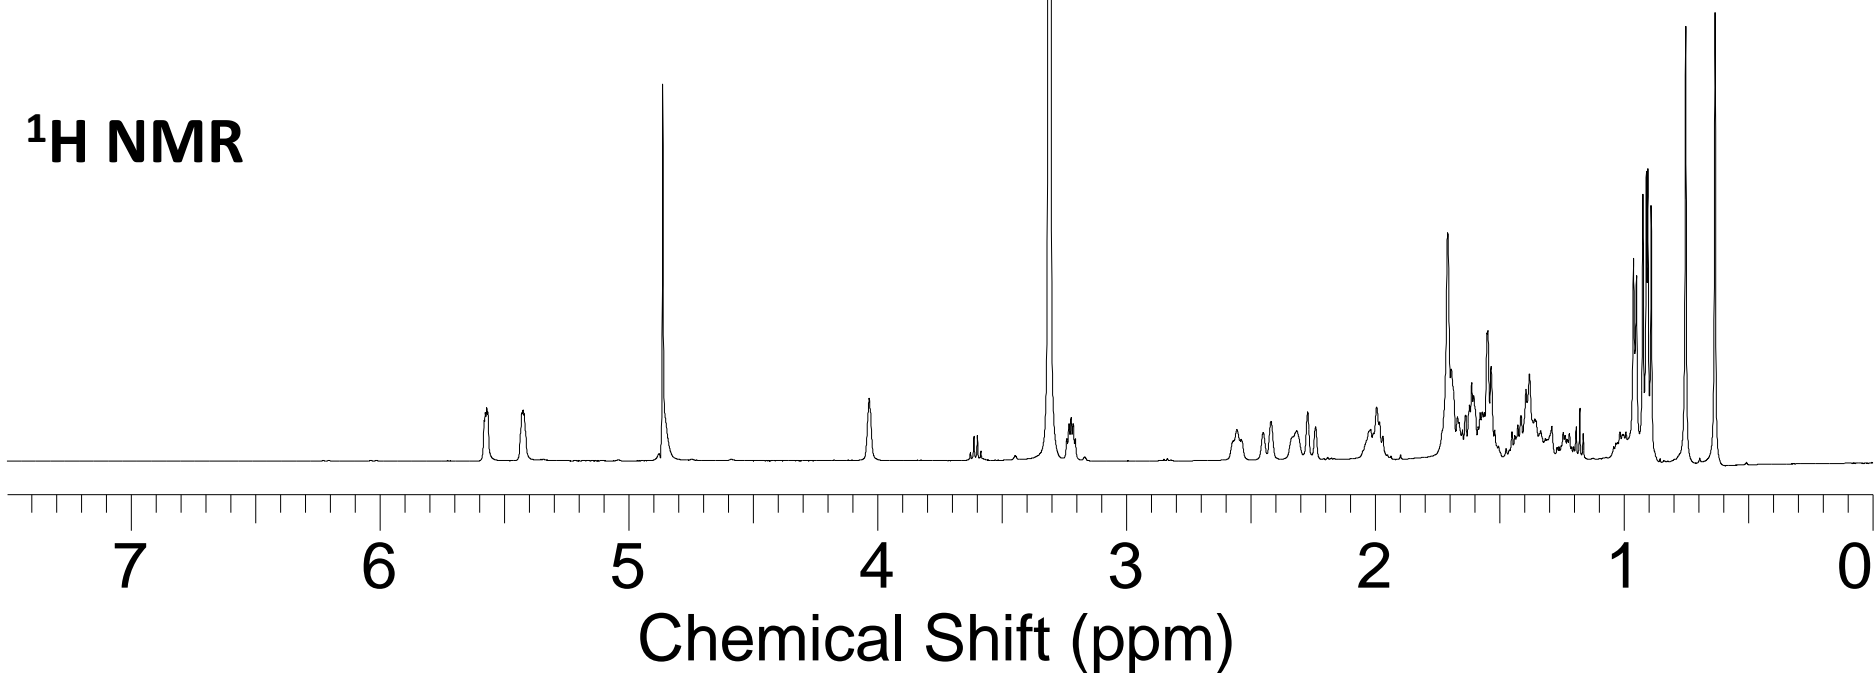



# 24(OH)Lumisterol

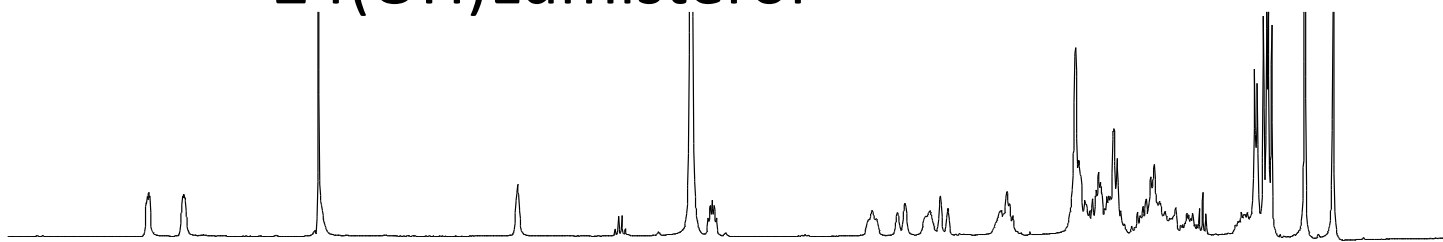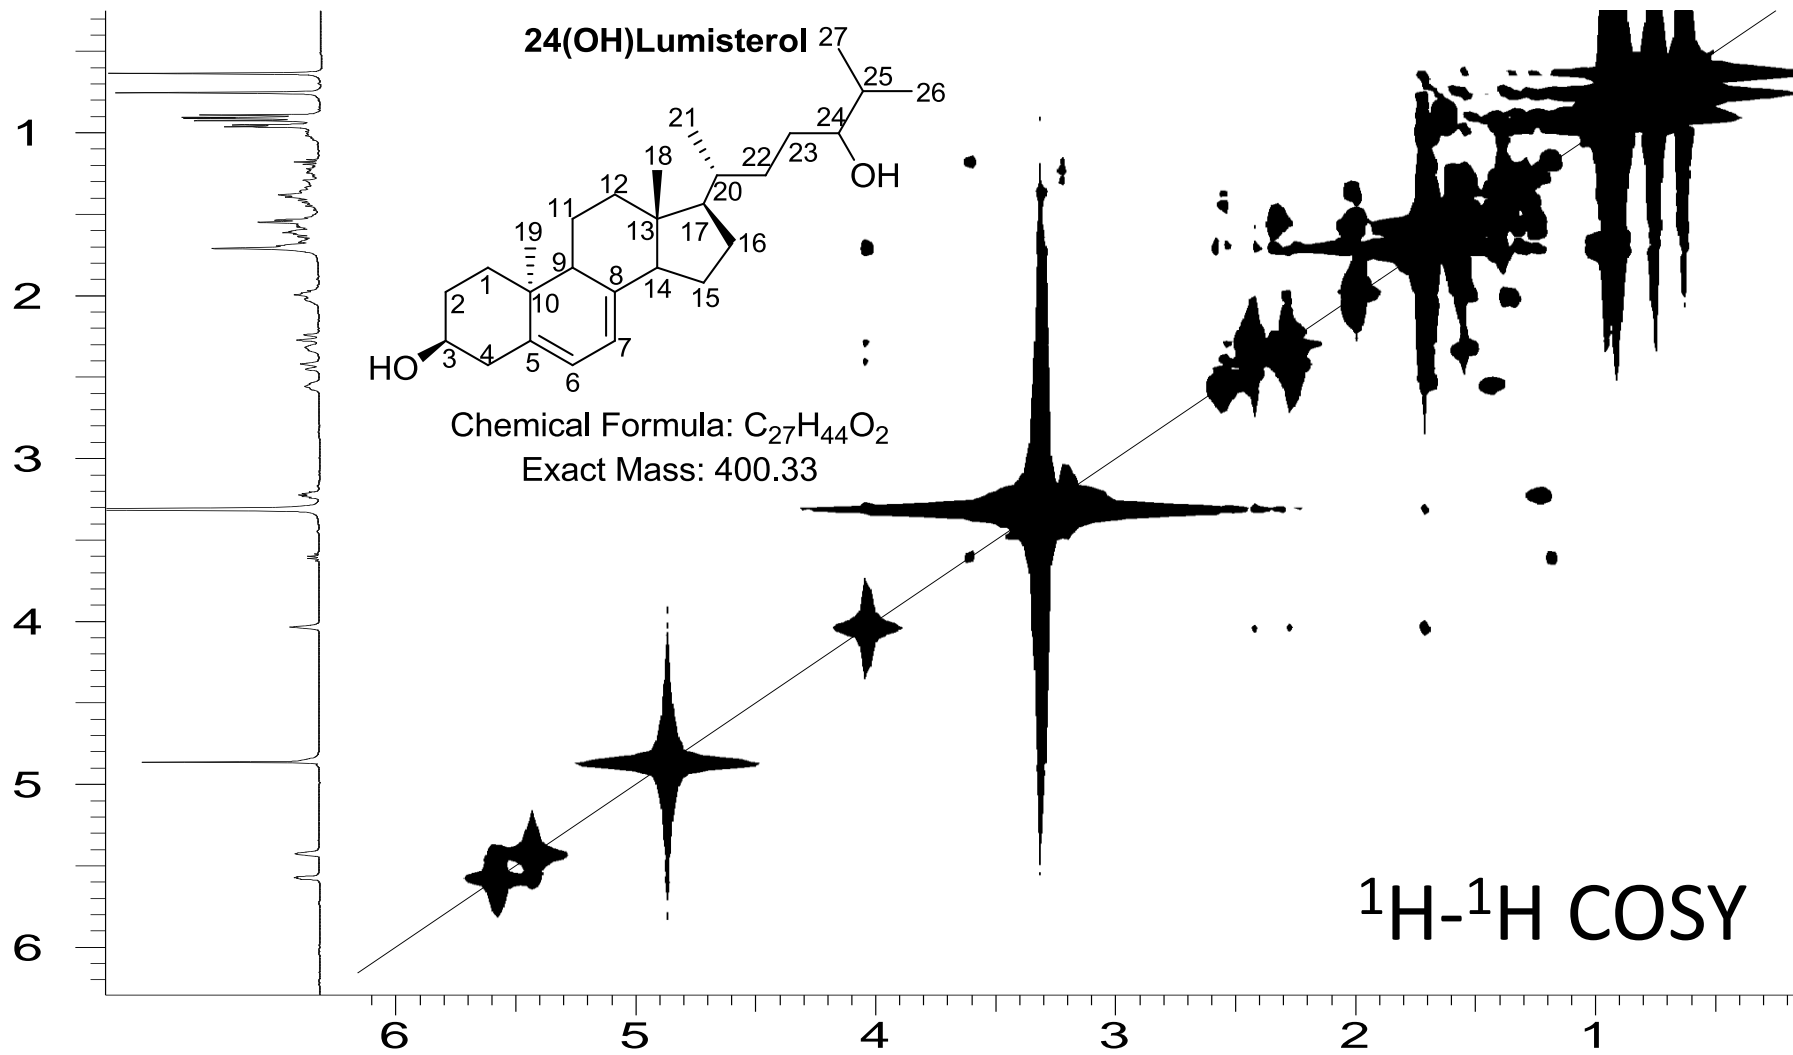

# 24(OH)Lumisterol

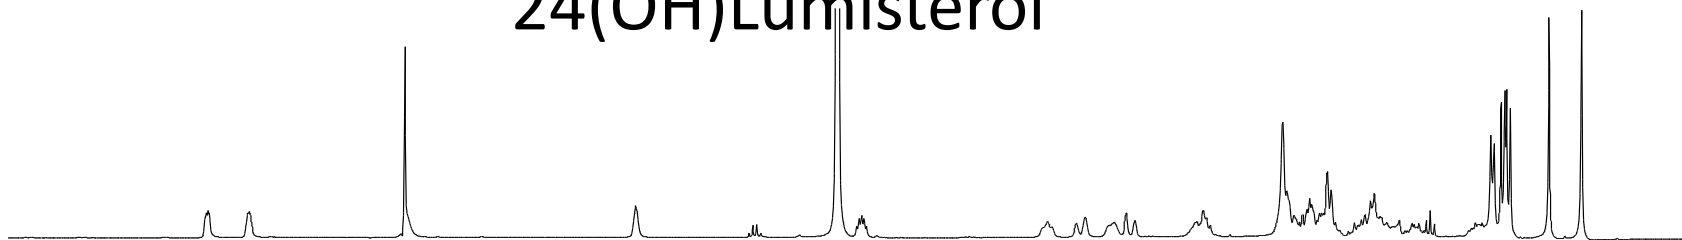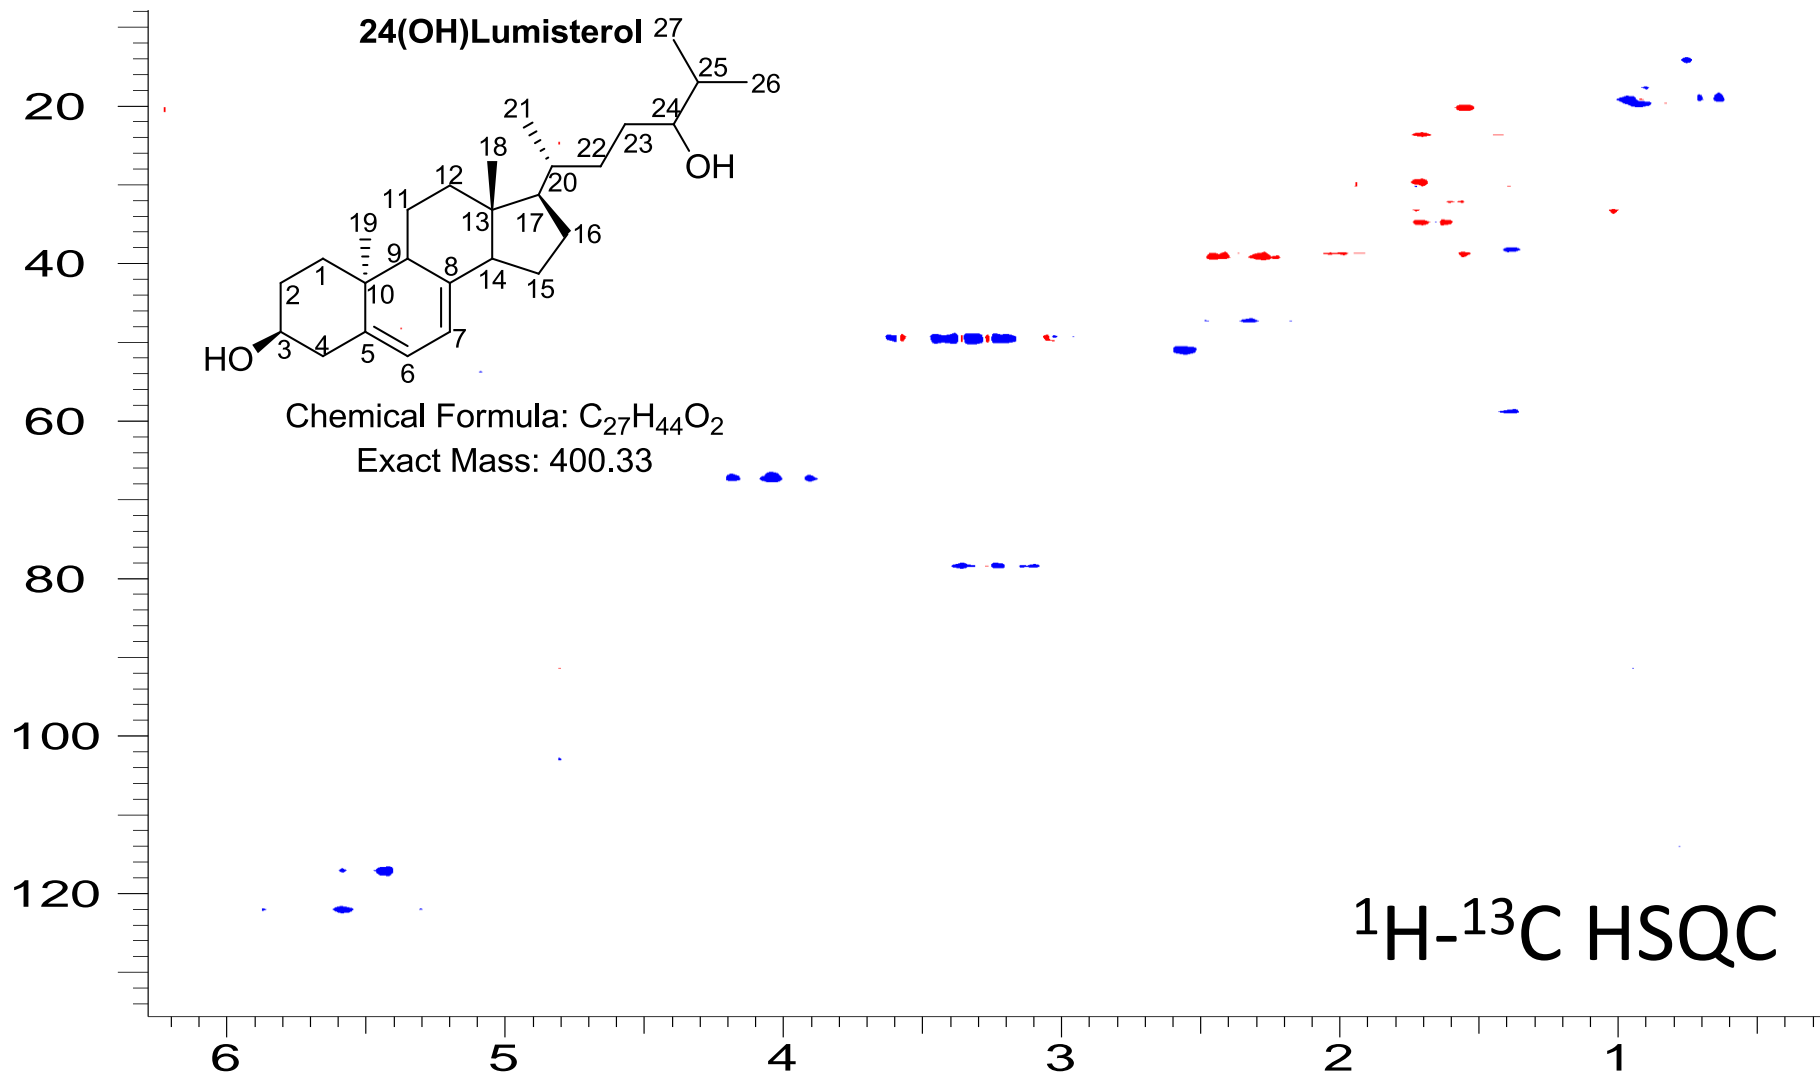

# 24(OH)Lumisterol

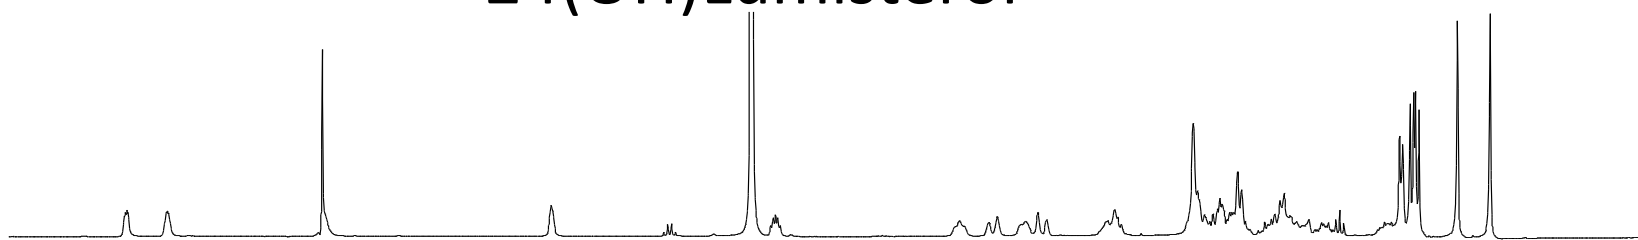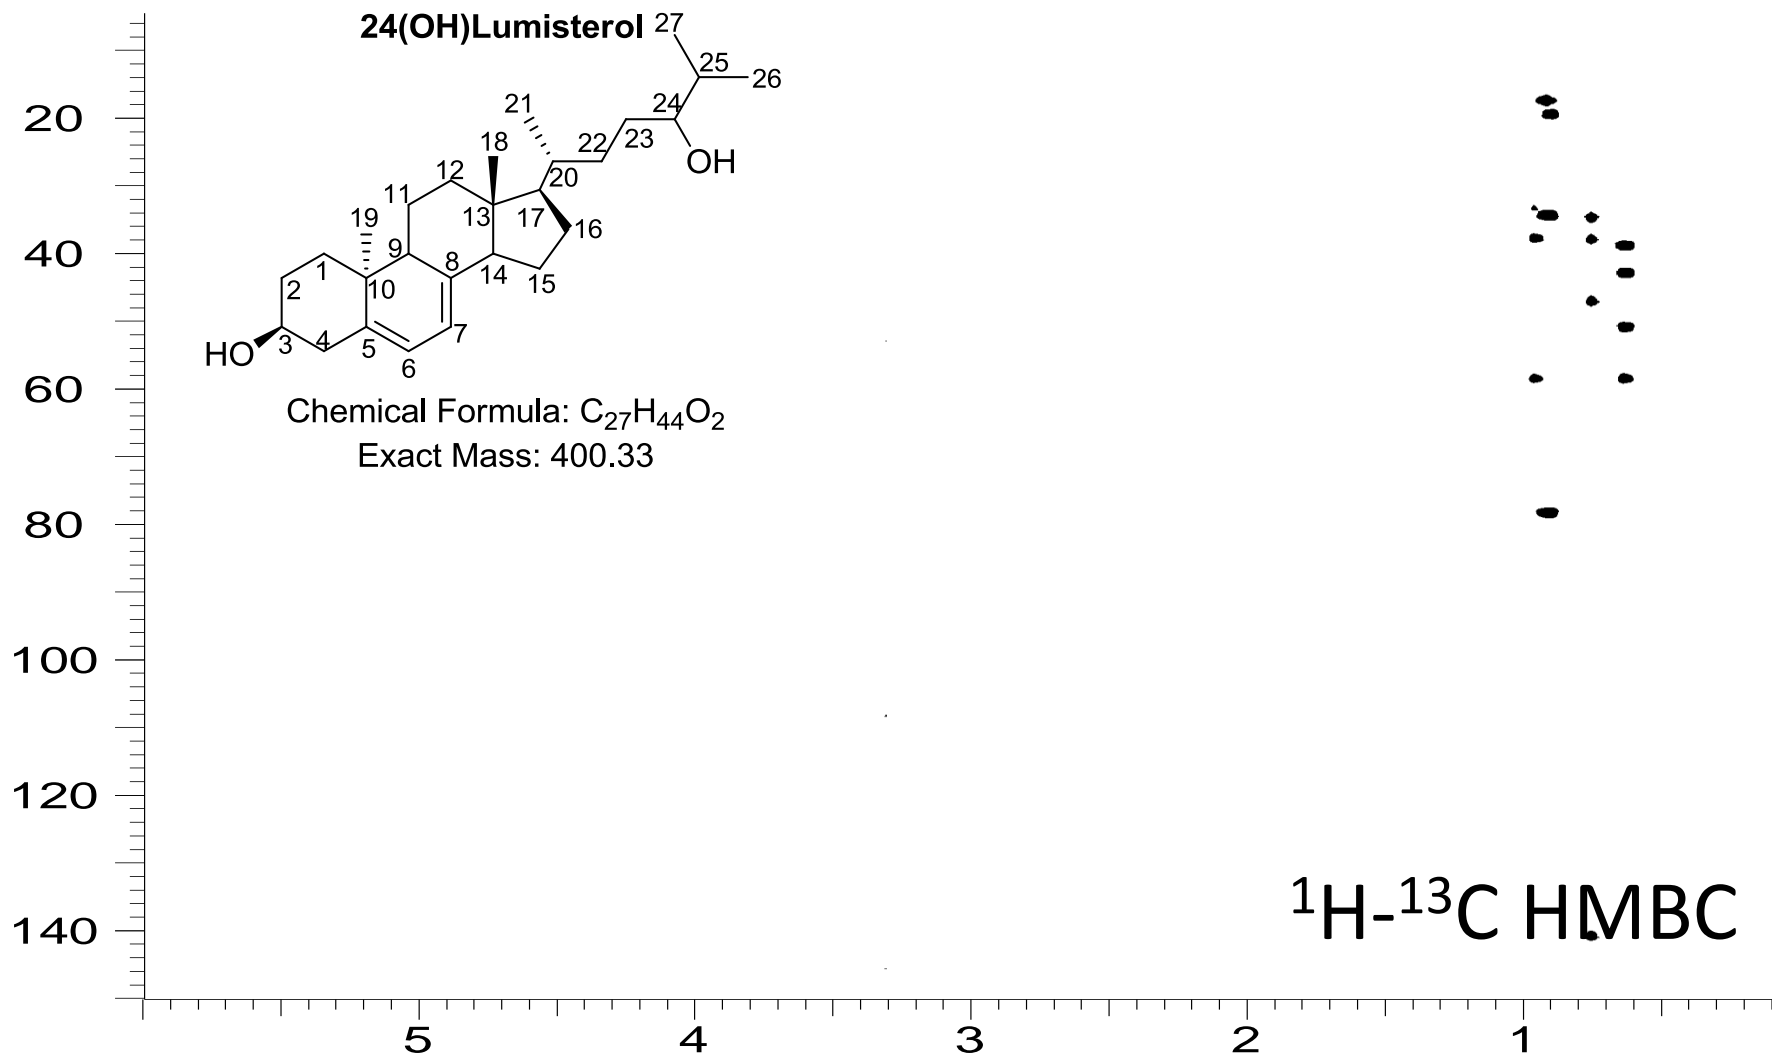

24(OH)Lumisterol

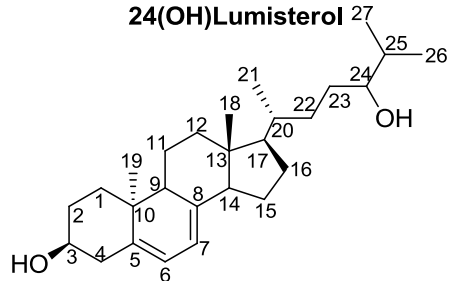

Chemical Formula: C<sub>27</sub>H<sub>44</sub>O<sub>2</sub>

Exact Mass: 400.33

# 24(OH)Lumisterol

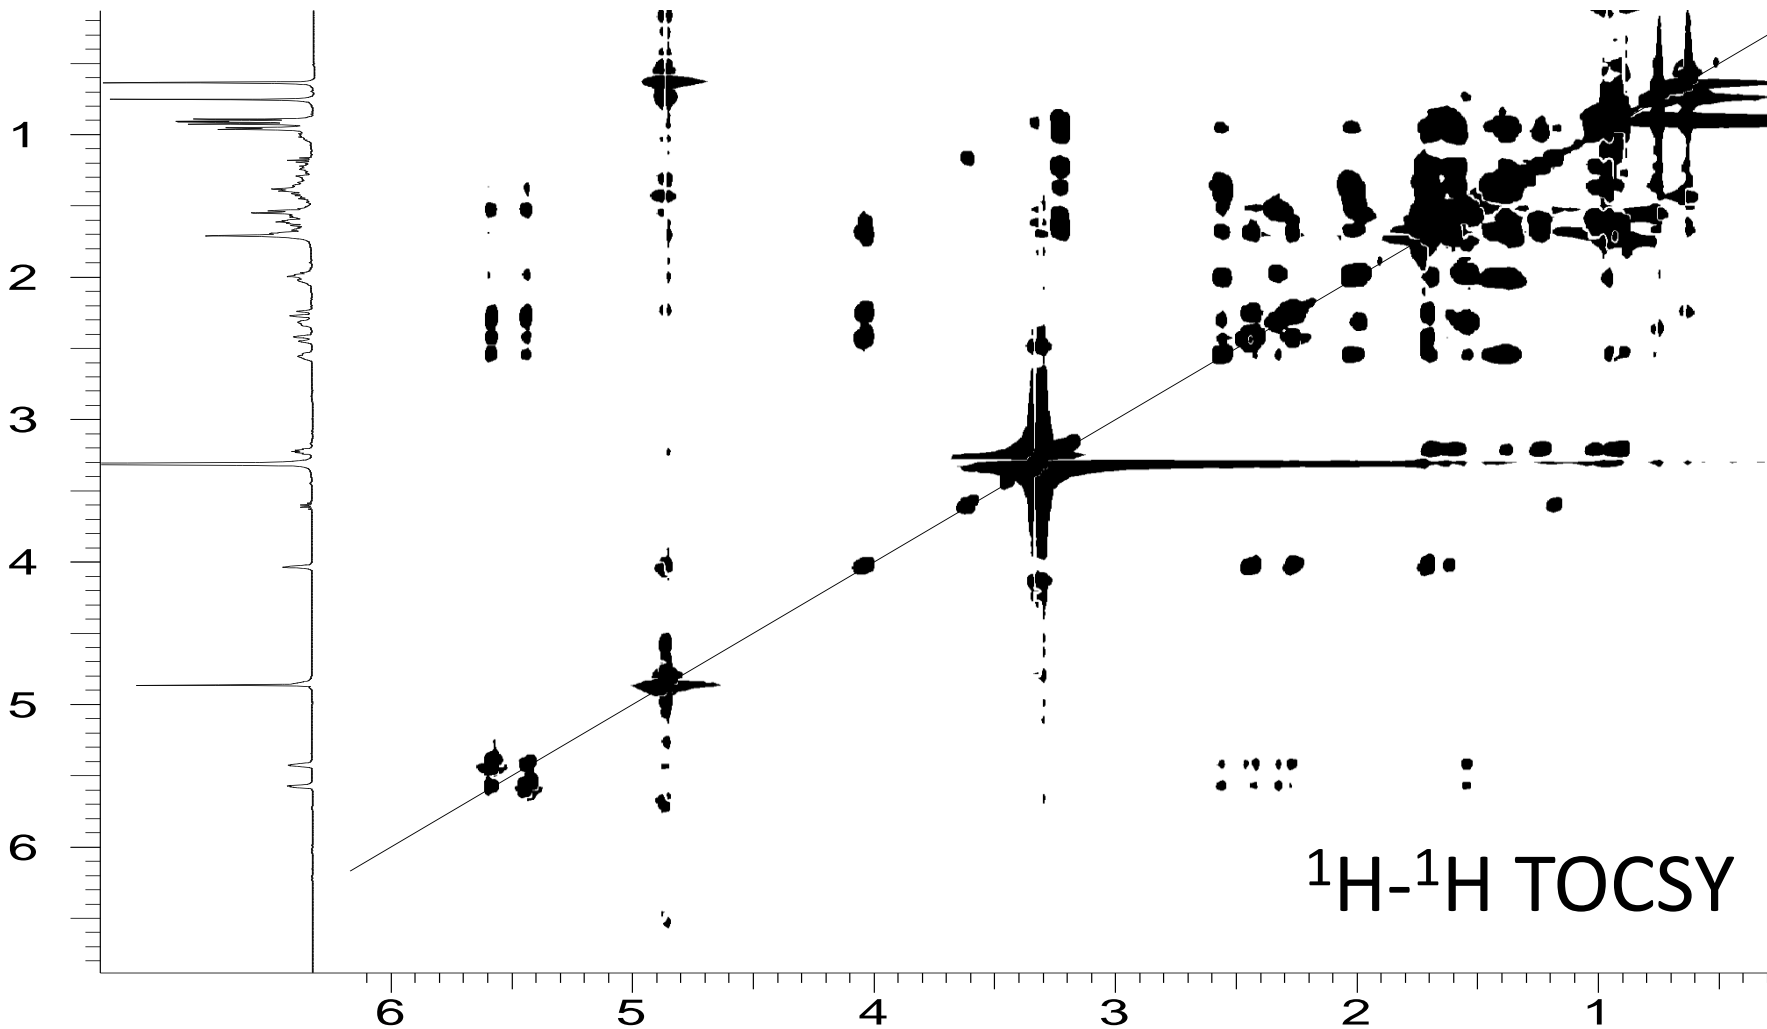

# Product A: 20,22(OH)<sub>2</sub>Lumisterol

## Mass spectrum

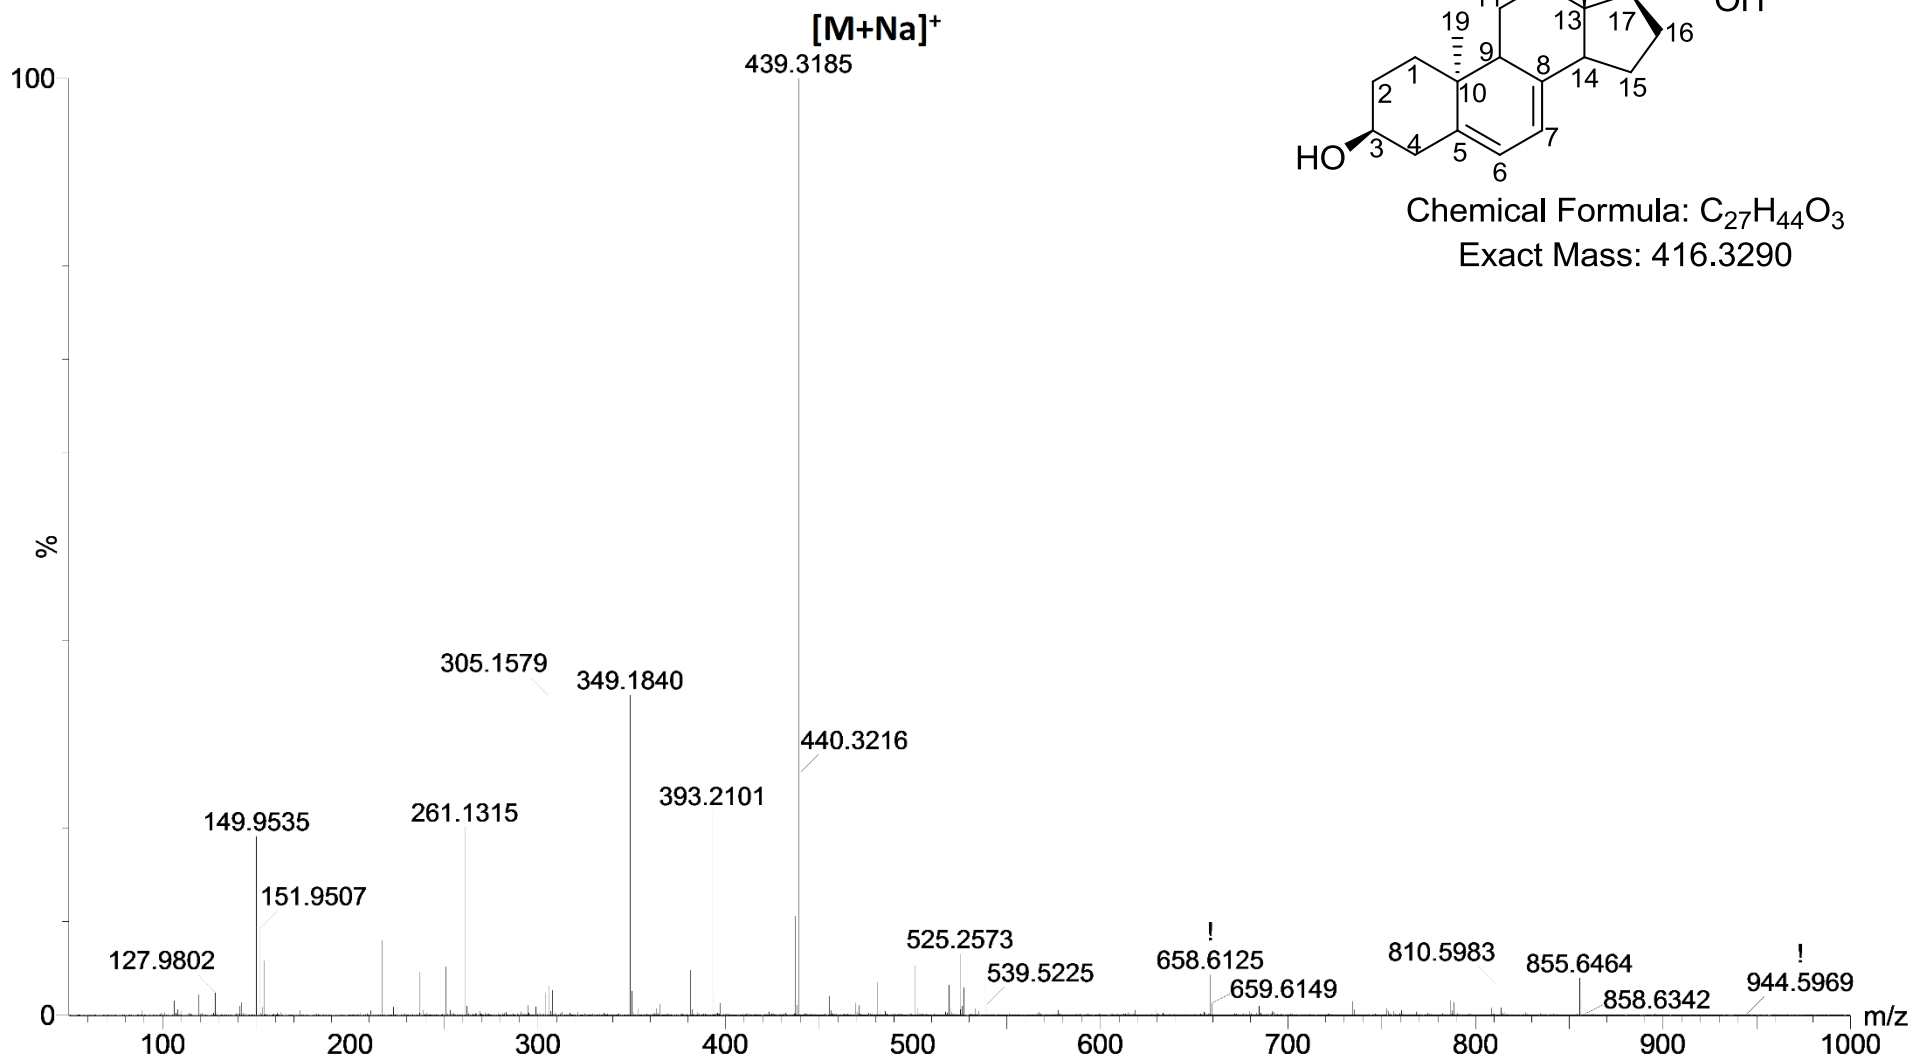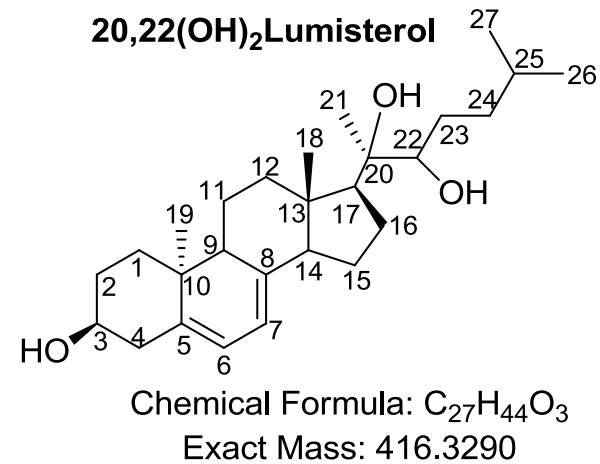

# 20,22(OH)<sub>2</sub>Lumisterol

# 20,22(OH)<sub>2</sub>Lumisterol

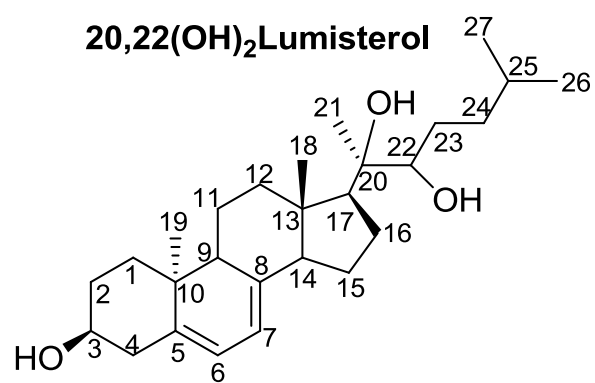

Chemical Formula: C<sub>27</sub>H<sub>44</sub>O<sub>3</sub>

Exact Mass: 416.3290

## <sup>1</sup>H NMR

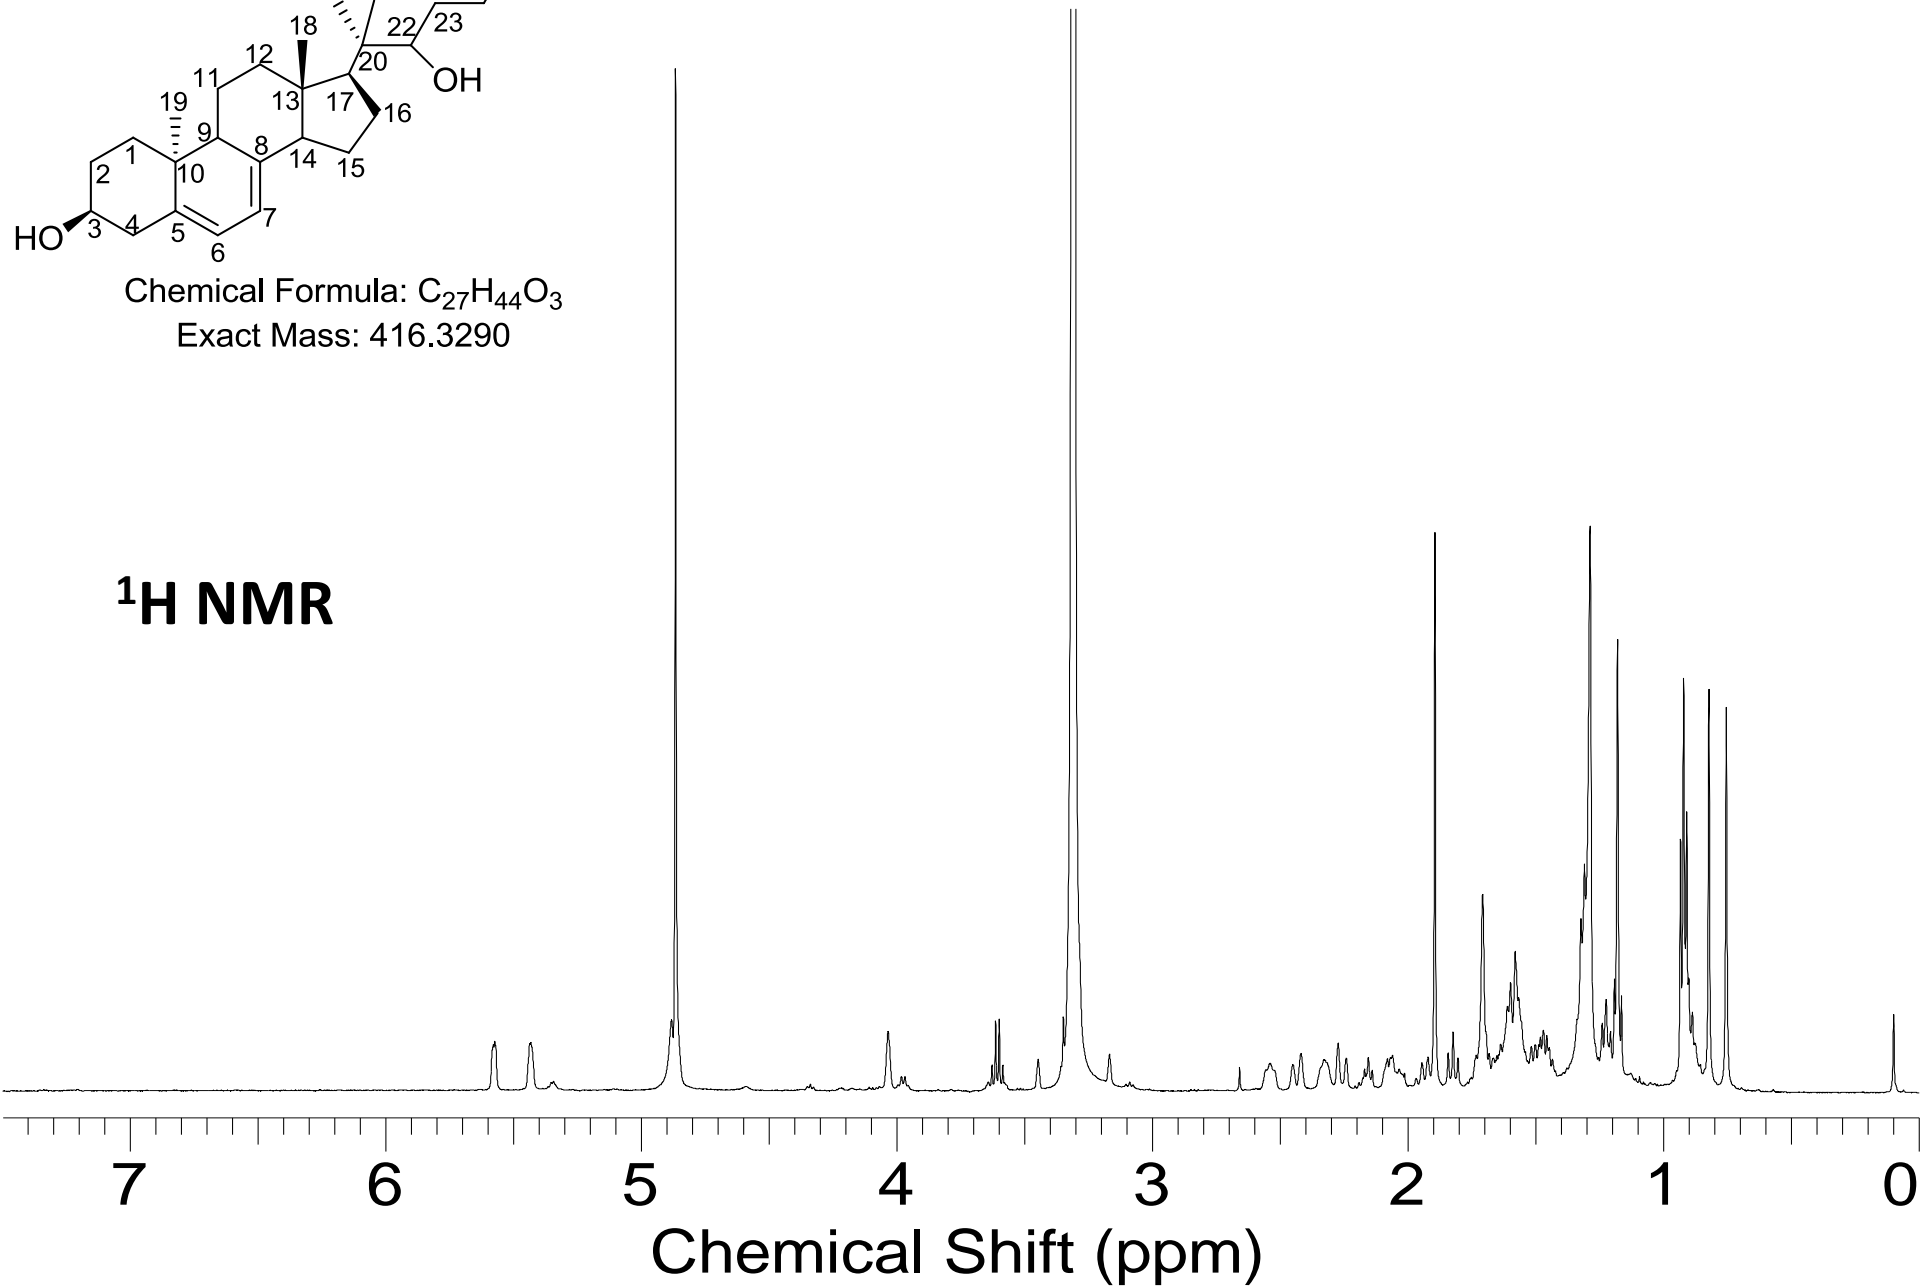

# 20,22(OH)<sub>2</sub>Lumisterol

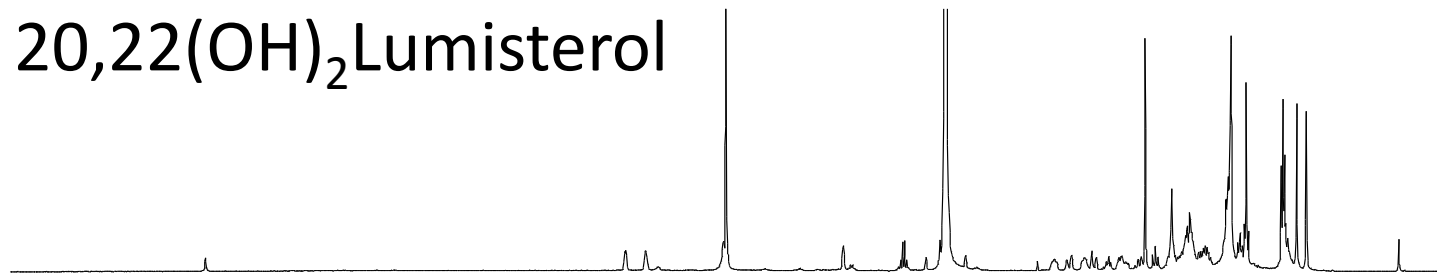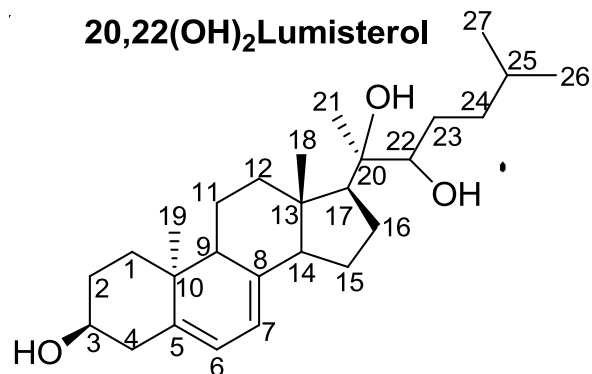

Chemical Formula: C<sub>27</sub>H<sub>44</sub>O<sub>3</sub>  
Exact Mass: 416.3290

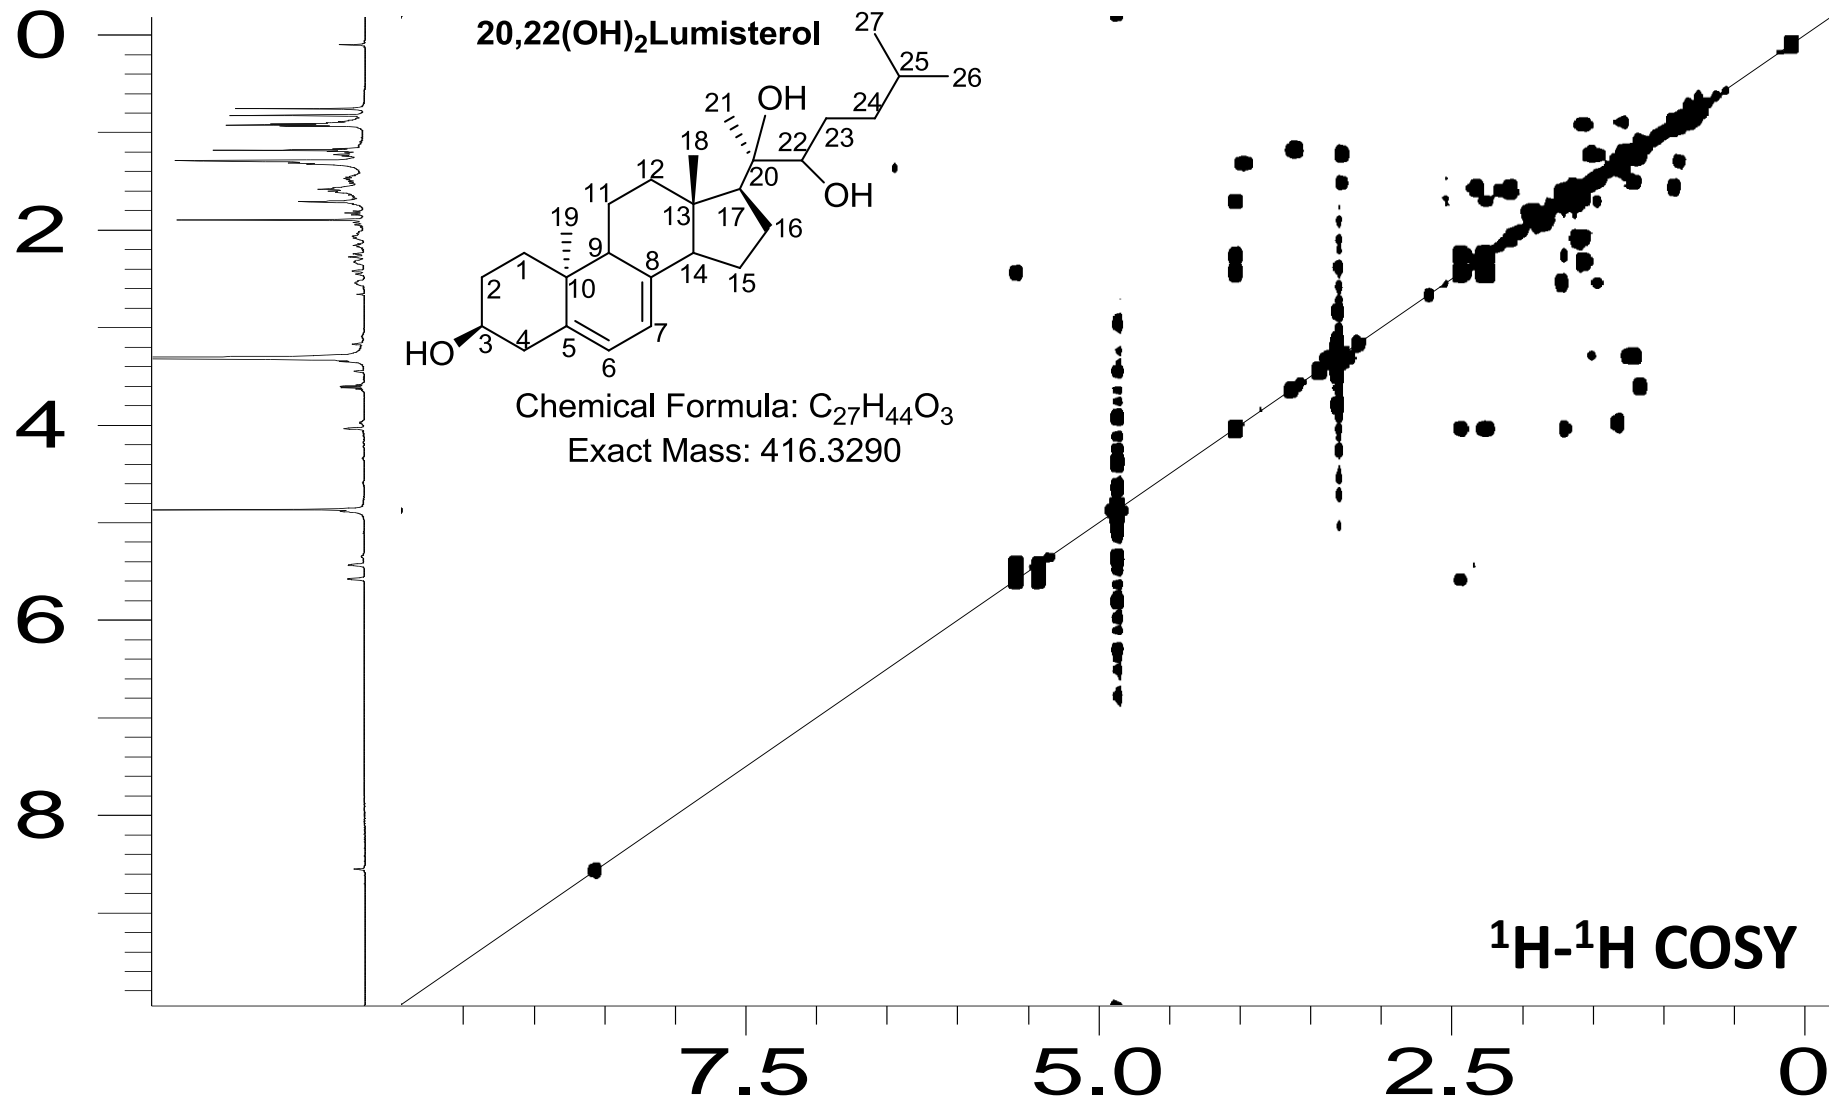

# 20,22(OH)<sub>2</sub>Lumisterol

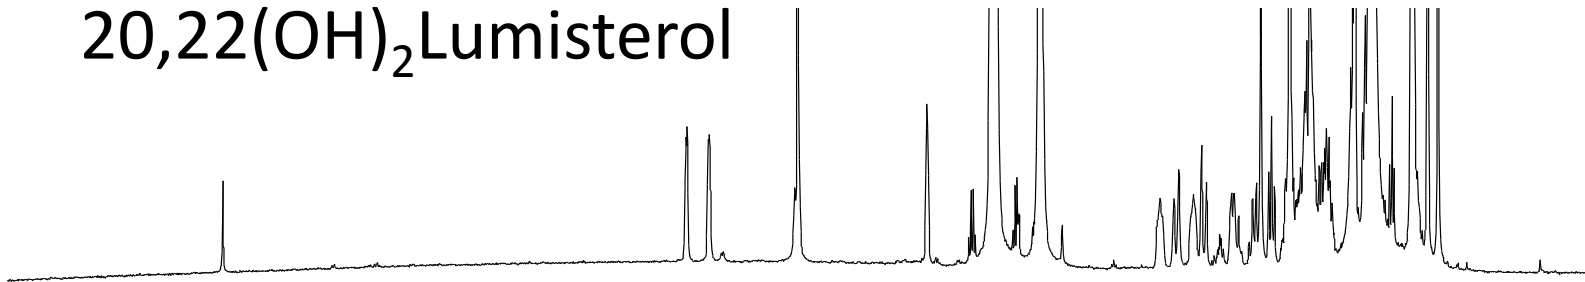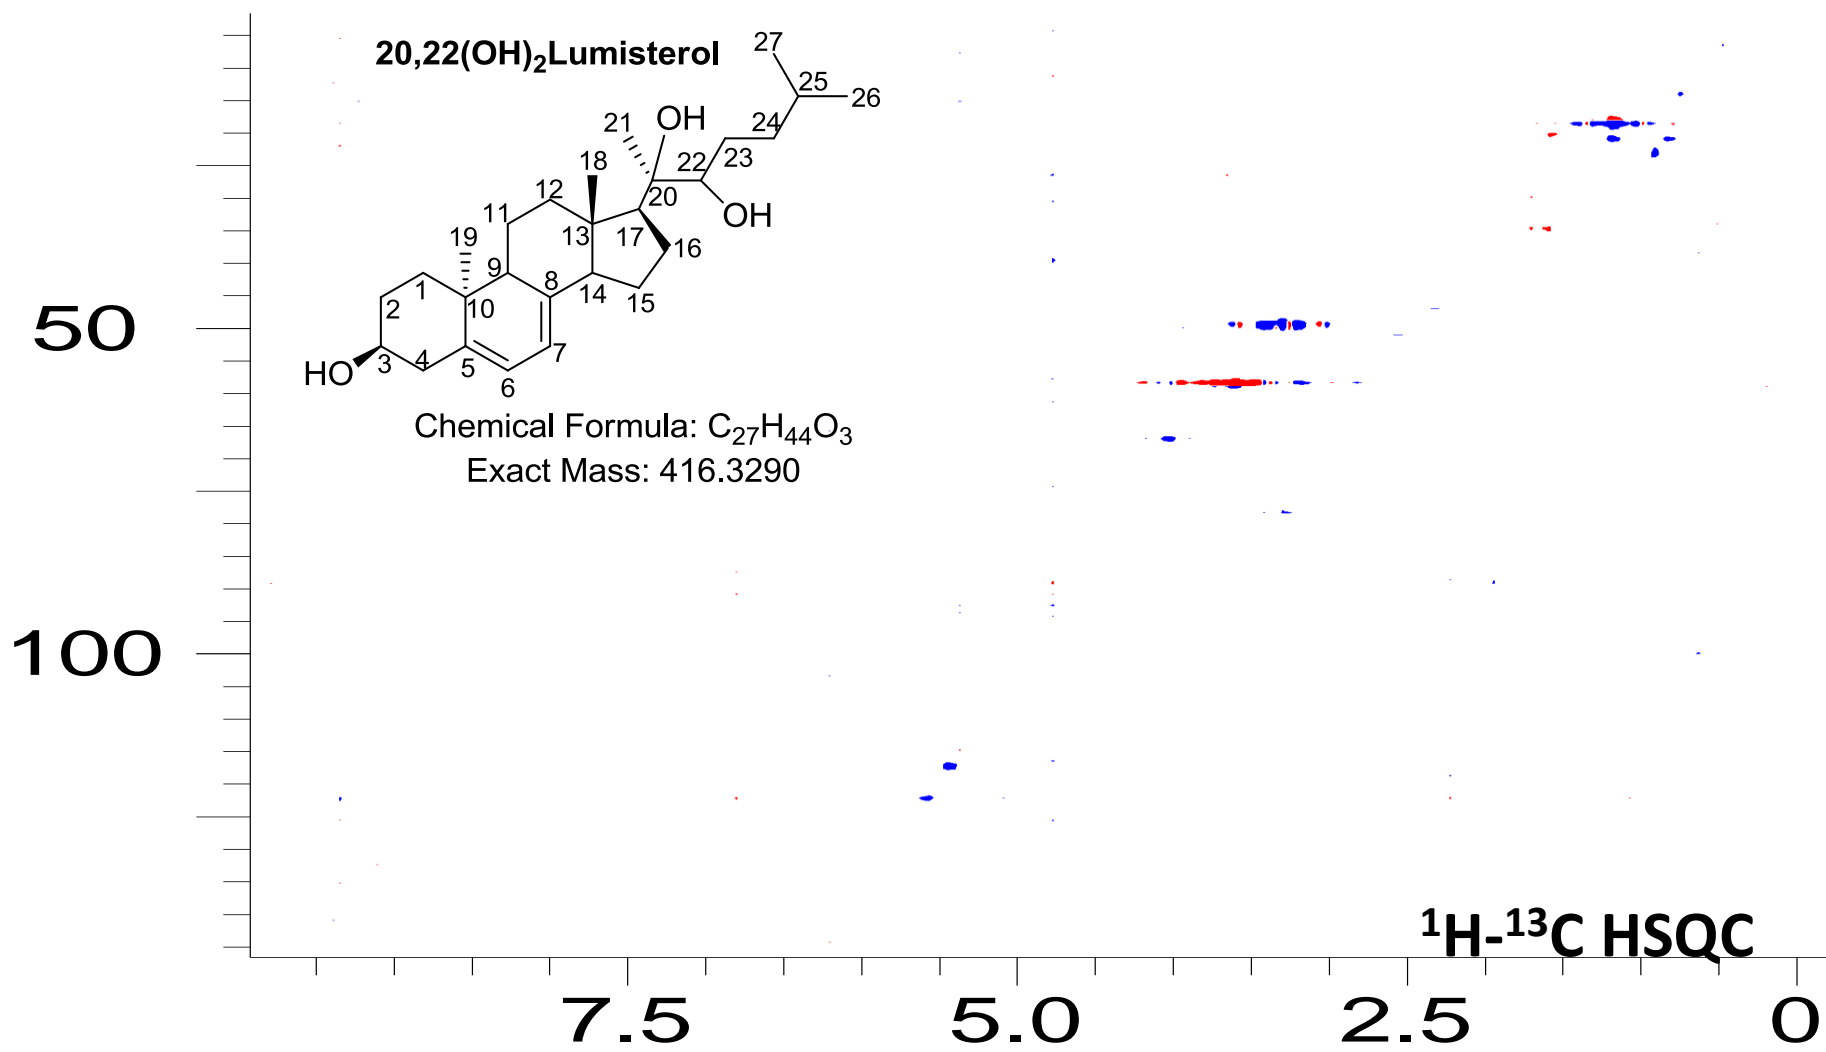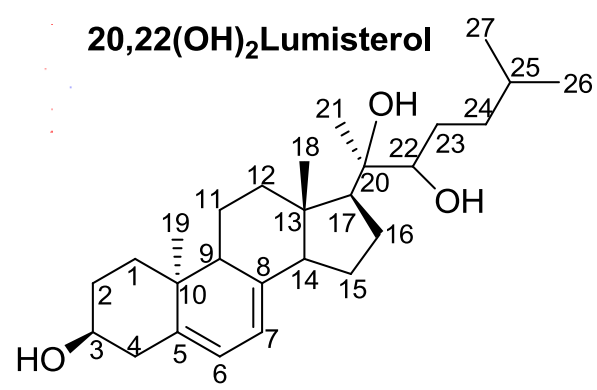

Chemical Formula: C<sub>27</sub>H<sub>44</sub>O<sub>3</sub>  
Exact Mass: 416.3290

<sup>1</sup>H-<sup>13</sup>C HSQC



# 20,22(OH)<sub>2</sub>Lumisterol

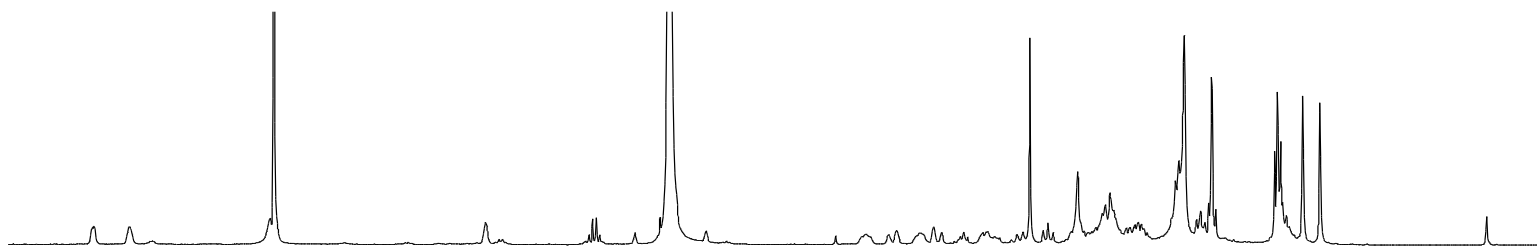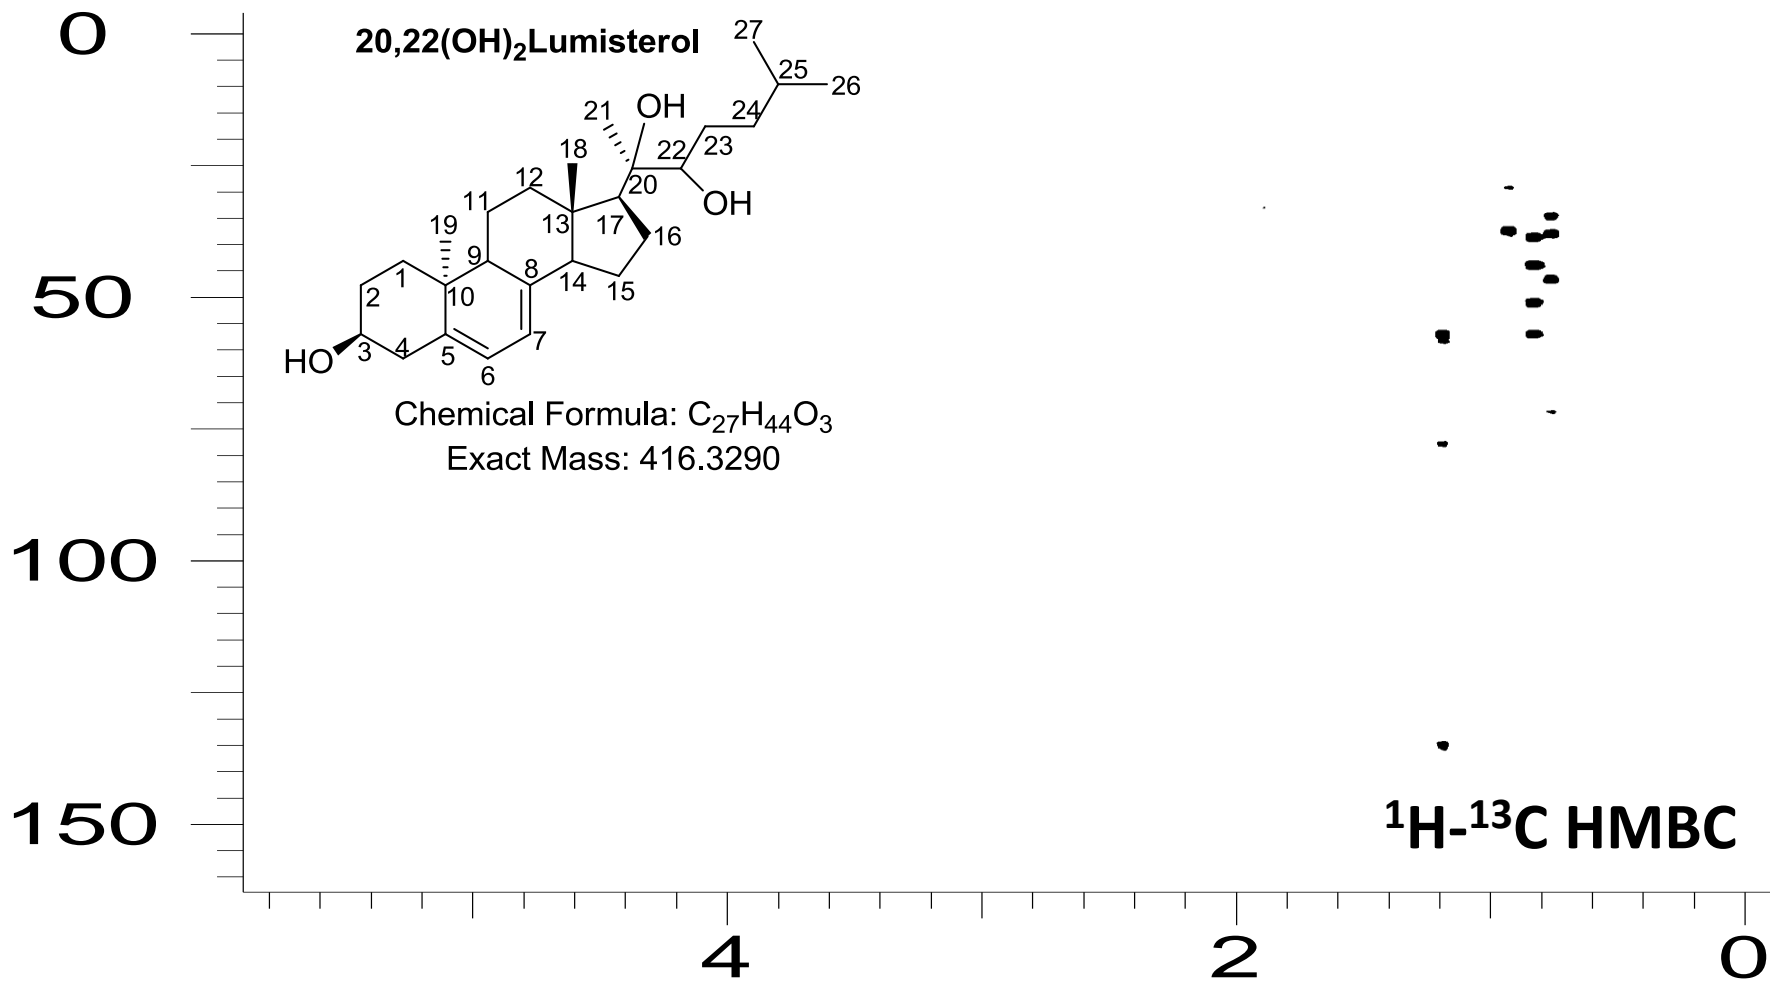

# 20,22(OH)<sub>2</sub>Lumisterol

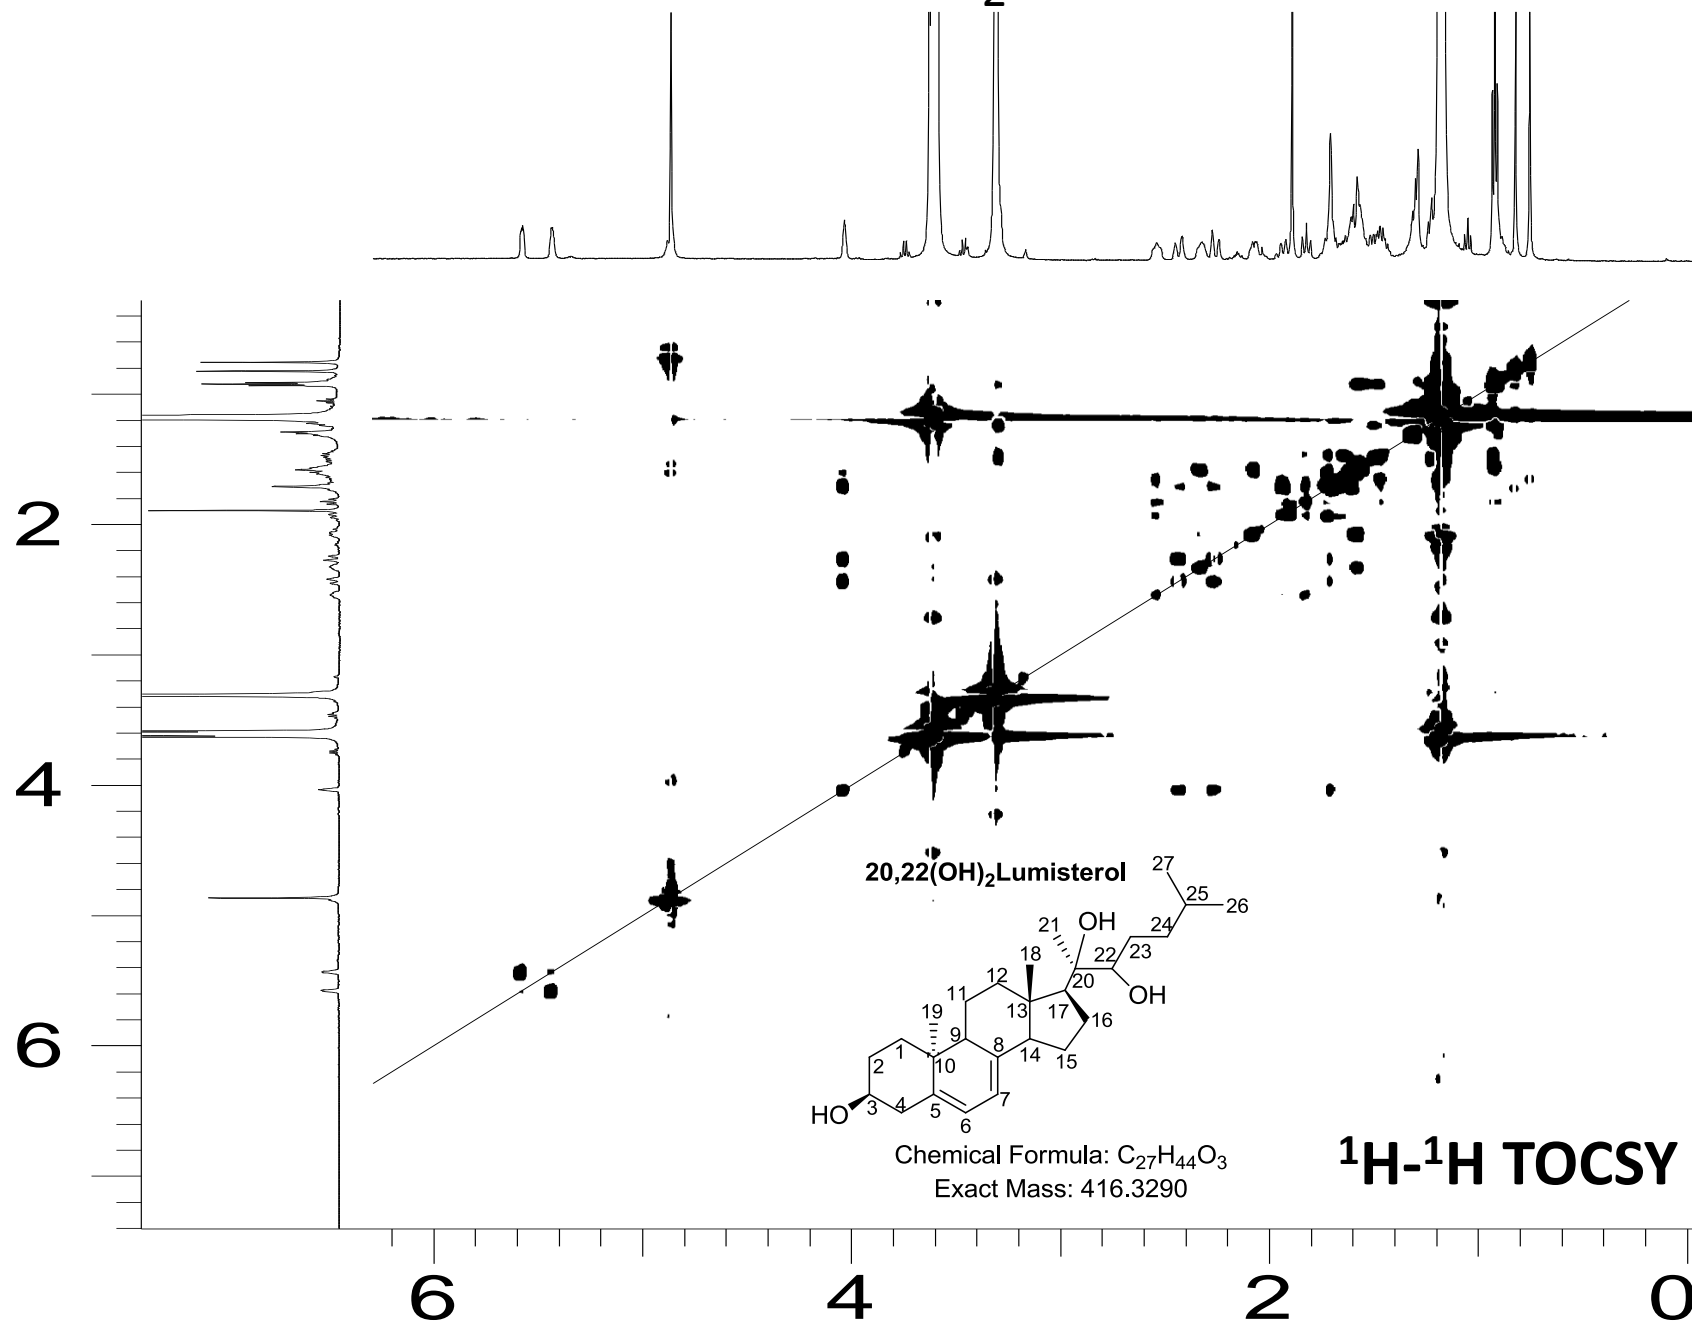

# Product E: dihydroxy-lumisterol

## Mass spectrum of product E

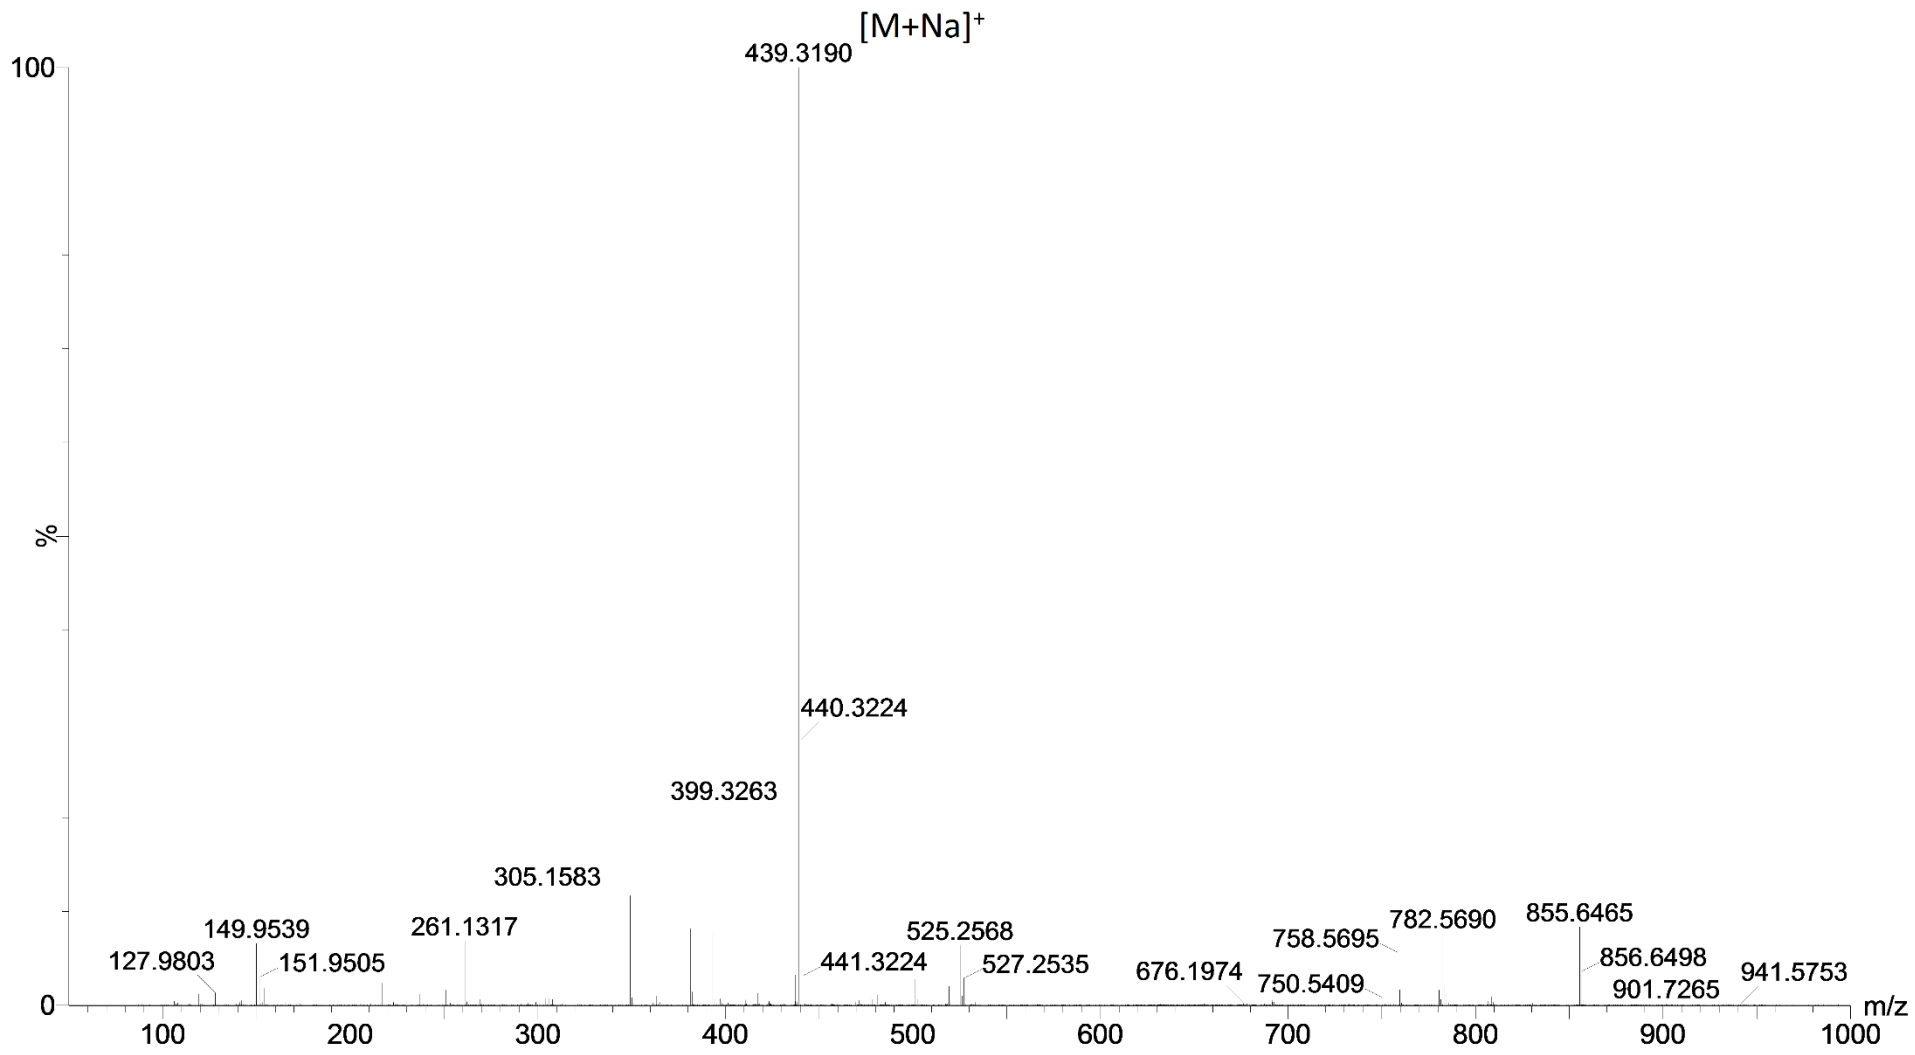

# Product G: dihydroxy-lumisterol

## Mass spectrum of product G

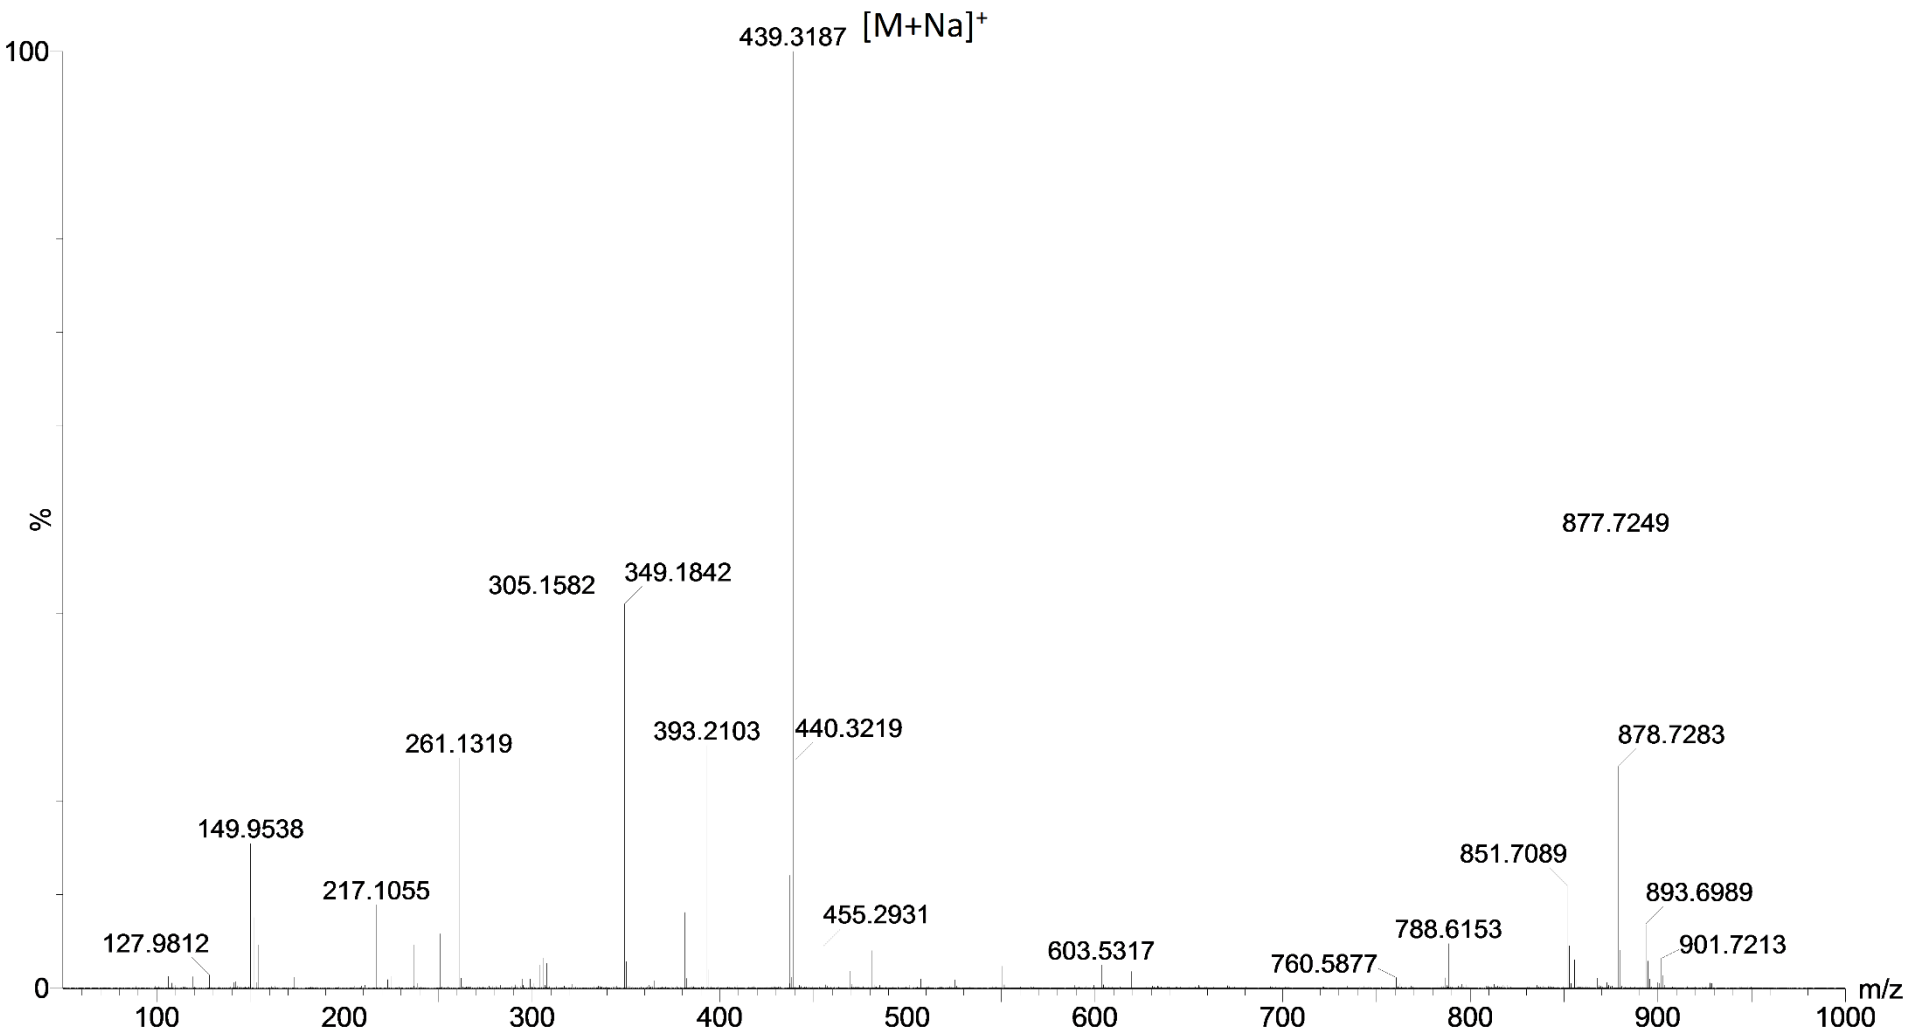

Supplement: NIHMS624587-supplement-Supplementary.pdf [file NIHMS624587-supplement-Supplementary.pdf]
